# Leptin Signalling in the Ovary of Diet-Induced Obese Mice Regulates Activation of Nod-Like Receptor Protein 3 Inflammasome

1 **Marek Adamowski<sup>1</sup>, Karolina Wołodko<sup>1</sup>, Joana Oliveira<sup>2</sup>, Juan Castillo-Fernandez<sup>3</sup>, Daniel**  
2 **Murta<sup>4,5</sup>, Gavin Kelsey<sup>3,6</sup>, António M. Galvão<sup>1,3,6\*</sup>**

3 <sup>1</sup>Department of Reproductive Immunology and Pathology, Institute of Animal Reproduction and  
4 Food Research of Polish Academy of Sciences, Olsztyn, Poland

5 <sup>2</sup>Centro de Investigação em Ciências Veterinárias, Lusófona University, Lisbon, Portugal

6 <sup>3</sup>Epigenetics Programme, The Babraham Institute, Cambridge, CB22 3AT, UK

7 <sup>4</sup>Centro de Investigação Interdisciplinar Egas Moniz (CiiEM), Escola Superior de Saúde Egas Moniz,  
8 Campus Universitário, Quinta da Granja, Monte de Caparica, Portugal

9 <sup>5</sup>C.I.I.S.A., Faculty of Veterinary Medicine, University of Lisbon, Lisbon, Portugal

10 <sup>6</sup>Centre for Trophoblast Research, University of Cambridge, Cambridge, CB2 3EG, UK

11 **\* Correspondence:**

12 António M. Galvão

13 antonio.galvao@babraham.ac.uk

14

15

16 **Keywords: ovary, inflammation, leptin, obesity, NLRP3inflammasome**

17

18

19

20

21

22

23

24

25

26

27

## 28 **1 Abstract**

29 Obesity leads to ovarian dysfunction and the establishment of local leptin resistance. The aim of our  
30 study was to characterise levels of Nod-Like Receptor Protein 3 (NLRP3) inflammasome activation  
31 during obesity progression in the mouse ovaries and liver and test the putative role of leptin on its  
32 regulation. C57BL/6J mice were treated with equine chorionic gonadotropin (eCG) or human  
33 chorionic gonadotropin (hCG) for oestrous cycle synchronisation and ovaries collection. In diet-  
34 induced obesity (DIO) model, mice were fed chow diet (CD) or high fat diet (HFD) for 4 or 16 weeks  
35 (wk), whereas in hyperleptinemic model (LEPT), mice were injected with leptin for 16 days (16L) or  
36 saline (16C) and in the genetic obese leptin-deficient *ob/ob* (+/? and -/-) animals were fed CD for  
37 4wk. Either ovaries and liver were collected, as well as cumulus cells (CCs) after superovulation  
38 from DIO and LEPT. In DIO protocol, protein expression of NLRP3 inflammasome components was  
39 increased in 4wk HFD, but decreased in 16wk HFD. Moreover LEPT and *ob/ob* models revealed  
40 NLRP3 and IL-1 $\beta$  upregulation in 16L and downregulation in *ob/ob*. Transcriptome analysis of CC  
41 showed common genes between LEPT and 4wk HFD modulating NLRP3 inflammasome. Moreover  
42 analysis in the liver showed upregulation of NLRP3 protein only after 16wk HFD, but also the  
43 downregulation of NLRP3 protein in *ob/ob*-. We showed the link between leptin signalling and  
44 NLRP3 inflammasome activation in the ovary throughout obesity progression in mice, elucidating  
45 the molecular mechanisms underpinning ovarian failure in maternal obesity.

46

47

48

49

50

51

52

53

54

## 55 **2 Introduction**

56 Obesity leads to self-directed tissue inflammation, a process mostly promoted by the  
57 continuous expansion of adipose tissue (Hotamisligil and Erbay 2008; Odegaard and Chawla 2008).  
58 Furthermore, literature presents a solid link between obesity and reproductive failure in women (Chu  
59 et al. 2007). Indeed, obesity in women has been associated to ovarian dysfunction, embryo  
60 implantation failure, abortion, foetal congenital abnormalities, and adult offspring adiposity and  
61 metabolic dysfunction (Chu et al. 2007; Penzias 2012; Robker 2008; Samuelsson et al. 2008). The  
62 ovaries from mice fed high fat diet (HFD) showed increased apoptosis and fewer mature oocytes  
63 (Jungheim et al. 2010). Furthermore, due to lipid accumulation, endoplasmic reticulum (ER) stress,  
64 mitochondrial dysfunction and increased ovarian cell apoptosis, these mice displayed anovulation  
65 and reduced *in vivo* fertilization rates (Wu et al. 2010), as well as abnormal embryo development  
66 (Minge et al. 2008). We have recently demonstrated the establishment of leptin resistance in the  
67 ovaries of mice treated with HFD (Wołodko et al. 2020) was mostly mediated by suppressor of  
68 cytokine signalling 3 (SOCS3). Hence, changes in local leptin signalling were shown to contribute to  
69 the pathophysiology of ovarian failure in obese females (Wołodko et al. 2021).

70 The inflammasome is a large intracellular protein complex that contains a cytosolic pattern  
71 recognition receptor. Among NOD-like receptors (NLR), the NLR protein 3 (NLRP3) inflammasome  
72 has been best characterised as a complex of proteins responsible for controlling the activity of two  
73 proinflammatory cytokines interleukin (IL)-1 $\beta$  and IL-18 (Davis, Wen, and Ting 2011; De Nardo and  
74 Latz 2011; Martinon, Burns, and Tschopp 2002). Activation of the pattern recognition receptor  
75 NLRP3 can be accomplished through two major signals: (i) priming signal, induced by the toll-like  
76 receptor (TLR)/nuclear factor (NF)- $\kappa$ B pathway; and (ii) pathogen-associated molecular patterns  
77 (PAMPs) and damage-associated molecular patterns (DAMPs) leading to assembly of inflammasome

78 (Lamkanfi and Dixit 2014; Martinon, Burns, and Tschopp 2002). Both mechanisms lead to the  
79 recruitment of the adapter apoptosis-associated speck-like protein containing a C-terminal caspase  
80 recruitment domain (ASC), resulting in the activation of pro-caspase-1 (CASP1) and cleavage into  
81 the active form (Davis, Wen, and Ting 2011). The formation and activation of the inflammasome is  
82 possible through ASC, which links NLRP3 to CASP1 by means of its pyrin and caspase recruitment  
83 domain motifs (Martinon et al. 2006). Finally, activated CASP1 is known to process the maturation  
84 of IL-1 $\beta$  and IL-18 into active cytokines (Lamkanfi 2011). Importantly, obesity and insulin resistance  
85 (IR) have been associated with inflammation and subsequent activation of NLRP3 inflammasome  
86 (Traba and Sack 2017). The onset of inflammasome activation was also shown to be mediated by  
87 factors like glucose, ceramide, uric acid, or lipopolysaccharide (LPS) (Stienstra et al. 2012; Traba  
88 and Sack 2017). Furthermore, secondary signals could also come from extracellular ATP inducing  
89 K<sup>+</sup> efflux; DAMPs/PAMPS leading to reactive oxygen species (ROS) production (Shao et al. 2015;  
90 Tózsér and Benkő 2016). Saturated free fatty acids (FFAs) were equally linked to inflammasome  
91 activation through both signals (Wen et al. 2011), as increased levels of FFAs are a general feature of  
92 obesity, IR or type-2 diabetes (Boden 2002; Krebs and Roden 2005). More recently, a link has been  
93 also established between NLRP3 inflammasome activation and levels of leptin signalling in various  
94 cellular contexts (Fu et al. 2017), corroborating the proinflammatory role of leptin (Cauble et al.  
95 2018).

96 A recent report has shown the presence of NLRP3 inflammasome components at ovarian  
97 level during follicular development in mice, suggesting its involvement in ovulation (Z. Zhang,  
98 Wang, and Zhang 2019). Most importantly, NLRP3 was also suggested to be involved in the  
99 pathophysiology of polycystic ovary syndrome (PCOS) (Rostamtabar et al. 2020). Therefore, we  
100 presently hypothesise the regulation of NLRP3 in the ovary of obese mice is mediated by leptin  
101 signalling. We firstly confirmed NLRP3 inflammasome expression profile changed in the ovaries of

102 cyclic mice. Subsequently, we also confirmed NLRP3 inflammasome components were differently  
103 expressed in the ovaries of 4 and 16 weeks (wk) diet induced obese (DIO) mice. Furthermore, using a  
104 mouse model of pharmacological hyperleptinemia (LEPT) and a genetic obese mouse which lacks  
105 leptin (*ob/ob*) we demonstrated the association between levels of leptin signalling and NLRP3  
106 inflammasome activation in the ovary of obese mice. Moreover, we analysed the transcriptome of  
107 cumulus cells (CCs), the somatic companions of the oocyte, and concluded once more that leptin  
108 treatment-upregulated genes associated with NLRP3 inflammasome. Finally, we studied the NLRP3  
109 inflammasome expression in the liver of DIO, LEPT and *ob/ob* mice and despite observing a  
110 different temporal signature in DIO, with regard to the ovary, we also found a consistent  
111 downregulation in NLRP3 inflammasome activity in *ob/ob*, which are obese and lack leptin.

## 112 **3 Materials & Methods**

### 113 *3.1 Animals*

114 Female B6 mice (8 wk old) and B6.Cg-Lepob/J (*ob/ob*) were housed in the Animal Facility of  
115 Institute of Animal Reproduction and Food Research, Polish Academy of Sciences in Olsztyn.  
116 Breeding pairs were purchased from Jackson Laboratories (Bar Harbor, ME). Mice were housed with  
117 free access to food and water for the duration of the study (humidity 50±10%; 23°C; 12L:12D cycle).  
118 All procedures were approved by the Local Animal Care and Use Committee for University of  
119 Warmia and Mazury, Olsztyn. Guidelines for animal experiments followed EU Directive  
120 2010/63/EU. Throughout the whole experiments, mice were monitored for any signs of welfare or  
121 disease. At 21 days of age female progeny were weaned and housed in groups of 3–5 in plastic cages  
122 with fresh sawdust bedding. By 8 wk of age, one group of B6 mice was subjected to hormonal  
123 protocol, while the other group was segregated into two different dietary protocols matched for  
124 similar body weight. In DIO model (n=10/group) mice were placed on standard CD (Picolab Rodent

125 diet 20, #5053) with 13% of calories coming from fat, or on HFD with 59 % of calories coming from  
126 fat (AIN-76A with 33% hydrogenated coconut oil; LabDiet) for 4 or 16 wk. Hyperleptinemia model  
127 (n=8/group) was utilized to mimic high level of leptin through its intraperitoneal injections twice a  
128 day at total dosage 100 µg/day (injected at 09:00 and 21:00), while the control group received saline  
129 injections(Recombinant Mouse Leptin, GFM26, Cell Guidance Systems). Regarding *ob/ob* model  
130 (n=6/group), mice were kept on CD until 12 wk of age.

### 131 *3.2 Induction of oestrus and dioestrus stages*

132 The oestrous cycle was monitored studying vaginal cytology. Cells collected via saline lavage  
133 were placed on glass slide and stained with Diff Quik® kit (Medion Diagnostics AG, Switzerland,  
134 DQ-ST). Oestrus was characterised by cornified epithelium cells; metoestrus by both cornified cells  
135 and leukocytes; dioestrus by predominant leukocytes; and pro-oestrus by nucleated cells, as  
136 previously described (Kyrönlahti et al. 2011).

137 Group of female B6 mice (8 wk old) was injected in oestrus stage with eCG (G4877, 5IU, Sigma  
138 Aldrich, Saint Louis, Missouri, USA) followed after 48 h by hCG (Chorulon, 5IU, MSD Animal  
139 Health, Boxmeer, Netherlands) and tissues collected 18-20 h later in E. The second group of mice  
140 were injected with hCG and tissues were collected 16-18 h later in D. To reduce variation between  
141 groups ovaries from females from the remaining experiments were collected in dioestrus stage.

### 142 *3.3 Protein extraction and Western blotting analysis*

143 Protein expression in mouse ovary and liver was assessed by Western blotting. Ovaries and livers  
144 were homogenized with RIPA buffer (R0278; Sigma) containing protease inhibitors  
145 (phenylmethylsulfonyl fluoride, PMSF and Protease Inhibitor Cocktail, P8340; Sigma-Aldrich, St.  
146 Louis, MO, US) and phosphatase inhibitors (Pierce Phosphatase Inhibitor Mini Tablets 88667;

147 Thermo Fisher Scientific) and incubated on ice for 1 h while vortexing in the meantime. After  
148 centrifugation (20 000 g, 15 min, 4°C) the supernatants were collected and protein concentration was  
149 determined with the Smith (Smith 1985) copper/bicinchoninic assay (Copper (II) Sulfate, C2284;  
150 Sigma and Bicinchoninic Acid Solution, B9643, Sigma). Samples were run (40 µg of protein) on 10-  
151 18% polyacrylamide gels. Immunoblotting was performed using the following primary antibodies  
152 NLRP3 (AG-20B-0014-C100; Adipogen), CASP1 (ab108362; Abcam), IL-18 (ab71495; Abcam), β-  
153 actin (A2228; Sigma), glyceraldehyde 3-phosphate dehydrogenase (GAPDH, ab9485; Abcam) and  
154 then transferred to nitrocellulose (10600009; GE Healthcare Life Science) or polyvinylidene fluoride  
155 (PVDF) membrane (IPVH00010; Merck Millipore). The membranes were blocked in phosphatase  
156 buffered saline (PBS) solution containing 3% powdered milk for 1 h. Primary antibodies were used at  
157 1:1 000 (NLRP3, CASP1) and 1:250 (IL-18) dilution and incubated overnight at 4°C. The following  
158 day, proteins were detected by incubating the membranes with a polyclonal anti-mouse horseradish  
159 peroxidase (HRP)-conjugated secondary (1:10 000, 31430; Thermo Fisher Scientific), polyclonal  
160 anti-rabbit HRP-conjugated secondary (1:20 000, 31460; Thermo Fisher Scientific), polyclonal anti-  
161 mouse alkaline phosphatase-conjugated secondary (1:10 000, 31321; Thermo Fisher Scientific) and  
162 polyclonal anti-rabbit alkaline phosphatase-conjugated secondary (1:10 000, A3687, Sigma)  
163 antibodies, for 1,5 h in chemiluminescence method or 2,5 h in colorimetric method at room  
164 temperature (RT). All antibodies specifications are summarised in **Table 1**. Immunocomplexes were  
165 visualized subsequently using chemiluminescence detection reagent (SuperSignal West Femto kit,  
166 34095; Thermo Fisher Scientific) or chromogenic substrate NBT/BCIP diluted 1:50 (11681451001;  
167 Roche) in alkaline phosphate buffer. Band density for each of the target protein was normalised  
168 against β-actin for NLRP3 and IL-18, while GAPDH was used for CASP1 as a reference protein.  
169 Finally, bands were quantified using the ChemiDoc or VersaDoc MP 4000 imaging system (Bio-  
170 Rad). Quantitative measurements of blot intensity were performed using ImageLab software.

### 171 3.4 Total RNA Isolation and cDNA Synthesis

172 Total RNA was extracted from whole ovary and 10 mg of liver, using TRI reagent (T9424;  
173 Sigma Aldrich) following the manufacturer's instructions. RNA samples were stored at -80°C.  
174 Concentration and quality of RNA was determined spectrophotometrically and the ratio of  
175 absorbance at 260 and 280 ( $A_{260/280}$ ) was analysed confirming good RNA quality. Subsequently, 2  
176  $\mu$ g of RNA was reverse transcribed into cDNA using Maxima First Strand cDNA Synthesis Kit for  
177 RT-qPCR (K1642; ThermoFisher Scientific) (Galvão et al. 2012).

### 178 3.5 Real-time PCR

179 Real-time PCR assays were performed in a 7900 Real-time System (Applied Biosystems), using a  
180 default thermocycler program for all genes: a 10 min preincubation at 95°C was followed by 45  
181 cycles of 15 sec at 95°C and 1 min at 60°C. A further dissociation step (15 sec at 95°C, 15 sec at  
182 60°C, and 15 sec at 95°C) ensured the presence of a single product. *Ribosomal protein L37 (Rpl37)*  
183 was chosen as a house keeping gene and quantified in each real-time assay together with target gene.  
184 Based on gene sequences in GenBank (National Center for Biotechnology Information), the primers  
185 for *Nlrp3*, *Casp1*, *Il-1 $\beta$* , *Il-18*, *Asc*, *Il-10*, *Tnf*, which sequences are presented in **Table 2**, were  
186 designed using Primer Express 3.0 software (Applied Biosystems). All reactions were carried out in  
187 duplicates in 384-well plate (4309849; Applied Biosystems) in 12  $\mu$ l of total solution volume  
188 (Galvão et al. 2014). The data were analysed using the real-time PCR Miner algorithm (S. Zhao and  
189 Fernald 2005).

### 190 3.6 ELISA immunoassay

191 The concentrations of IL-1 $\beta$  in tissue extracts of ovaries and livers were determined using an IL-1  
192 beta Pro-form Mouse Uncoated ELISA kit (88-8014-22; Thermo Fisher Scientific) following



193 manufacturer's instructions. The standard curve concentrations ranged from 25 ng/ml to 3000 ng/ml  
194 and interassay coefficient variation (CV ) was 7.27%.

### 195 *3.7 Statistical analysis and data presentation*

196 Statistical analyses were performed using the GraphPad Prism Software (Version 7.01, GraphPad  
197 Software, Inc.; La Jolla, CA, USA). Paired t test was employed to compare the changes of protein  
198 expression in mouse livers and ovaries. Comparisons of gene expression were performed using  
199 Wilcoxon matched pairs test. Results are presented as mean with standard deviation. Differences  
200 between the means for all tests were considered statistically significant if  $p < 0.05$ .

### 201 *2.8 RNA-seq data from CCs*

202 Methods followed the previously described (Wołodko et al. 2020). The GEO accession  
203 number for the dataset Sequencing is under submission.

## 204 **4 Results**

### 205 *4.1 NLRP3 inflammasome components expression change in the ovary of cyclic mice*

206 We first sought to characterise the expression of NLRP3-induced inflammasome components  
207 in the ovaries of mice, throughout the oestrous cycle. Fifteen female 8 wk old C57BL/6 (B6) mice  
208 were treated with hormones in order to synchronise oestrous cycle (**Figure 1A**). Mice received either  
209 equine chorionic gonadotropin (eCG) or human chorionic gonadotropin (hCG), as previously  
210 described (Hasegawa et al. 2016). Ovaries were collected in oestrus (E) and dioestrus (D) stage and  
211 further processed for mRNA or protein expression analysis, respectively. Real-time PCR analysis  
212 ( $n=7$ /group) revealed increased levels of *Casp1*, *Il-1 $\beta$*  and *Il-18* mRNA in D stage (**Figure 1B**,  
213  $p < 0.05$ ). Moreover, Western blotting revealed increased NLRP3 protein expression in D (**Figure 1C**,  
214  $p < 0.05$ ), as well as the pro-peptide (p24) and mature form (p18) of IL-18 (**Figure 1F, G**;  $p < 0.01$ ).

215 Regarding CASP1, the long form (p45) was decreased in D (**Figure 1D**;  $p < 0.05$ ), but no significant  
216 changes were observed for the active CASP1 (p20) (**Figure 1E**). These results suggest the activation  
217 of NLRP3 inflammasome in D stage, through upregulation of NLRP3 and its downstream mediator  
218 IL-18. Next, we characterised the cellular distribution of NLRP3 protein in the ovaries collected from  
219 mice in D, using immunohistochemistry (IHC) and immunofluorescence (IF). We confirmed that  
220 NLRP3 protein was globally distributed in the ovary (**Figure 1I**). On the other hand, a closer  
221 observation with IHC revealed staining in granulosa cells (GC) and theca cells (TC), as well as  
222 oocytes, in all developmental stages of follicles in the ovary (**Figure 1K-M**). Negative controls  
223 stained with secondary antibodies did not reveal any brown staining (**Figure 1H, J**). The specificity  
224 of our IHC staining was corroborated by IF, in which a clear brown staining was observed in GC, TC  
225 and oocytes (**Figure 1O-U**). Negative control stained with rabbit immunoglobulin type G (IgG)  
226 confirmed no staining (**Figure 1N**). Our results once more corroborate the findings of Zhang and co-  
227 workers who not only observed the presence of NLRP3 protein in GC, TC and oocytes by IHC, but  
228 also confirmed the upregulation of NLRP3 in the ovaries of eCG treated mice (Z. Zhang, Wang, and  
229 Zhang 2019). Therefore, in subsequent experiments, collections were consistently performed in D.

#### 230 4.2 Time-course activation of NLRP3-induced inflammasome in the ovary of DIO mice

231 In the following experiment, we tested the effect of short (4 wk) versus long term (16 wk)  
232 HFD treatment on NLRP3-induced inflammasome activation in the ovary of mice (**Figure 2A**). We  
233 used the DIO protocol previously validated, in which female mice were fed chow diet (CD) or HFD  
234 for 4 or 16 wk ( $n=8$ /group) (Wołodko et al. 2020). After the DIO protocol, we recorded the average  
235 body weight (BW) of 19.7 gram (g) in 4 wk CD group and 24.8 g in 4 wk HFD group, whereas the  
236 16 wk CD presented on average BW of 22.6 g and 16 wk HFD 37.6 g BW (**Table 3**). After  
237 collection, ovaries were processed for mRNA and protein expression analysis. Real-time PCR  
238 analysis ( $n=6-8$ ) revealed increased mRNA of *Nlrp3* after 4 wk HFD (**Figure 2B**,  $p=0.06$ ), whereas

239 *Il-1 $\beta$*  levels were increased after both 4 wk and 16 wk of HFD (**Figure 2B**,  $p < 0.05$ ). Regarding  
240 Western blotting analysis ( $n=8$ ), we found the expression of NLRP3, CASP1 p45 and pro-IL-18 p24  
241 were increased in 4 wk HFD group, compared to control group (**Figure 2C, D, and F**,  $p < 0.05$ ,  
242 respectively). However, opposite pattern was observed in 16 wk HFD, with downregulation of  
243 NLRP3 expression, the mature form of CASP1 p20 and both forms of IL-18 (p24 and p18) (**Figure 2**  
244 **C, E, F and G**,  $p < 0.05$ ). Finally, we also confirmed IL-1 $\beta$  protein level was upregulated in 16 wk  
245 HFD after measurement by enzyme linked immunosorbent assay (ELISA) ( $n=6$ ) (**Figure 2H**,  
246  $p=0.082$ ). Therefore, we presently confirmed that NLRP3, the pro-proteins IL-18 (p18, p24) and  
247 CASP1 (p45) despite being upregulated after 4 wk HFD treatment, after 16 wk HFD treatment a  
248 consistent downregulation of NLRP3 inflammasome, particularly NLRP3, CASP1 (p20) and both  
249 forms of IL-18, was seen. As a result, increased IL-1 $\beta$  protein after 16 wk HFD should be promoted  
250 independently from the NLRP3 inflammasome pathway (Lukens et al. 2014; Ranson et al. 2018).

### 251 *4.3 Leptin signalling in the ovary drives activation of NLRP3 inflammasome during obesity* 252 *progression*

253 After temporally characterising the expression profile of NLRP3-induced inflammasome  
254 components in the ovary of DIO mice, we further interrogated whether activation of the NLRP3  
255 inflammasome was regulated by leptin signalling. Indeed, leptin was previously shown to modulate  
256 NLRP3 expression *in vitro* (Fu et al. 2017). Furthermore, the expression signature of NLRP3  
257 inflammasome components in the ovaries of DIO mice overlapped both tyrosine 985 of leptin  
258 receptor (Tyr985ObRb) and Janus kinase 2 (JAK2) phosphorylation profile, with the increase at 4 wk  
259 HFD treatment being followed by inhibition at 16 wk HFD and concomitant establishment of leptin  
260 resistance (Wołodko et al. 2020). Therefore, we analysed the levels of NLRP3 inflammasome  
261 components in the ovaries of a previously validated mouse model of pharmacological  
262 hyperleptinemia, which presented increased systemic levels of leptin and increased leptin signalling

263 in the ovary without obesity (Wołodko et al. 2020), and a genetically obese mouse B6.Cg-Lepob/J  
264 (*ob/ob*), characterised by extreme obesity without leptin. In the pharmacological hyperleptinemic  
265 model, ten female B6 8 wk old mice, were treated with leptin intraperitoneally, twice a day for 16  
266 days (16 L), whereas controls were administered saline (16 C) (Wołodko et al. 2020). Moreover, ten  
267 female *ob/ob* control (+/?) and ten females homozygous mutant (-/-), 8 wk old were kept on CD for 4  
268 wk (**Figure 3A**). Ovaries from all groups were collected and processed for mRNA and protein  
269 expression analysis. Real-time PCR analysis (n=6-8/group) revealed an increase in *Nlrp3* and *Casp1*  
270 in 16 L, but decrease in *ob/ob* -/- mice (**Figure 3B**,  $p<0.05$ ). Furthermore, mRNA of *Il-1 $\beta$*  was  
271 upregulated in 16 L (**Figure 3B**,  $p<0.05$ ). Finally, the mRNA of *Il-18* was significantly  
272 downregulated in *ob/ob* -/- group (**Figure 3B**,  $p<0.05$ ). With regard to protein expression, we found  
273 the 16 L group presented increased levels of NLRP3 (**Figure 3C**,  $p<0.05$ ), whereas the opposite  
274 pattern was observed in *ob/ob* -/- mice, comparing to control groups (**Figure 3C**,  $p<0.05$ ).  
275 Accordingly, both pro-peptides CASP1 (p45) and CASP1 (p20) showed increased levels in 16 L  
276 (**Figure 3D, E**;  $p=0.07$  and  $p<0.05$ , respectively), nonetheless, no significant changes were found in  
277 the *ob/ob* model. Importantly, IL-1 $\beta$  protein measured by ELISA was increased in 16 L, but  
278 decreased in *ob/ob* -/- (**Figure 3F**,  $p<0.05$ ). In this experiment we revealed the functional link  
279 between leptin signalling and NLRP3 inflammasome components regulation in the ovary, with leptin  
280 treatment inducing the activation of NLRP3 and CASP1 with subsequent secretion of IL-1 $\beta$ .  
281 Furthermore, the absence of NLRP3 inflammasome activation in the ovary of *ob/ob* -/- confirms the  
282 preponderant role active leptin signalling exerts on NLRP3 inflammasome activation in the ovary.

283 *4.4 Leptin promotes changes of NLRP3 inflammasome components gene expression in cumulus cells*  
284 *during early onset of obesity*

285 In this experiment we examined whether the association previously observed between leptin  
286 signalling and NLRP3 inflammasome activation found in whole ovaries holds true at the cellular

287 level, particularly for the somatic companions of the female gamete, the CCs. Indeed, the ovary is a  
288 very heterogeneous organ, with follicles in different developmental stages, and different somatic cells  
289 supporting oocyte development (Chang, Qiao, and Leung 2017). Therefore, we reanalysed our RNA  
290 sequencing (RNA-seq) datasets from CCs from the 4 wk HFD, 16 wk HFD and 16 L groups  
291 (Wołodko et al. 2020). Briefly, we collected approximately 50 CCs per animal, after superovulation,  
292 and RNA-seq libraries were generated using a Smart-seq2 oligo-dT method (**Figure 4A**; Wołodko et  
293 al. 2020). We started confirming the expression level of leptin and NLRP3 pathway components for  
294 16 L and 4 wk HFD. Despite no changes in *Nlrp3* in CCs after 4 wk HFD, the gene was upregulated  
295 in 16 L (**Figure 4B**). Certainly, the low coverage of the samples (an average of 5.5 million reads) and  
296 the weak expression level of *Nlrp3* in CCs may account for the lack of changes in 4 wk HFD.  
297 Nonetheless, the consistent upregulation of various components of the NLRP3 inflammasome, like  
298 *Nlrp3* itself, or *Il-18*, *Casp1*, *Il-1 $\beta$*  and *Asc* in 16 L, is suggestive of the stimulatory effect of leptin on  
299 the expression of NLRP3 inflammasome genes also in CCs (**Figure 4B**). As previously shown,  
300 DESeq analysis revealed 997 differentially expressed genes (DEGs) in 4 wk HFD and 2026 DEGs in  
301 16 L (Wołodko et al. 2020), in comparison to their control groups ( $p < 0.05$ ; Wołodko et al. 2020). In  
302 the present analysis, we overlapped the DEGs from 4 wk HFD and 16 L and identified seven genes  
303 either up- or downregulated in both conditions (**Figure 4C**). Subsequently, we integrated these 14  
304 DEGs with the main components of NLRP3 and leptin signalling pathways (Wołodko et al. 2020)  
305 based on the correlation between their expression levels ( $p > 0.90$ ), obtaining five clusters, with one of  
306 them underscoring the gene interaction between *Casp1*, *phosphatase and tensin homolog (Pten)* and  
307 *signal transducer and activator of transcription 5a (Stat5a)*, as well as the link between *Socs3* and *Il-*  
308 *1 $\beta$* , known as an important axis involved in the mediation of immune response (Chaves de Souza et  
309 al. 2013). Importantly, other genes were highlighted in the network, as *solute carrier family 22*  
310 *member 15 (Slc22a15)*, a cell membrane transporter and metabolic gene (Nigam 2018), or *stress*  
311 *associated endoplasmic reticulum protein 1 (Serp1)* involved in protein unfolding and stress response

312 (Yamaguchi et al. 1999). Indeed, metabolic performance in the preovulatory follicle is tightly  
313 regulated and involves the crosstalk between GC and oocyte (Wołodko et al. 2021). Also, the ER  
314 stress is a common feature observed in the ovaries of obese mothers (Robker, Wu, and Yang 2011)  
315 (**Figure 4D**). Finally, gene ontology analysis for the presented network revealed three main events, as  
316 negative regulation of glucose transport, positive regulation of cytokine biosynthesis and response to  
317 ATP (**Figure 4E**,  $p < 0.05$ ). Those certainly are key processes for oocyte maturation, as glucose  
318 metabolism in GC provides energy supplies for oocyte maturation (Wołodko et al. 2021).  
319 Furthermore, energy production through lipid oxidation and ATP production, is also fundamental for  
320 oocyte maturation (Wołodko et al. 2021). Finally, we plotted a subset of genes known to directly  
321 activate the NLRP3 inflammasome signalling pathway (Weber et al. 2020), particularly regarding the  
322 regulation of glutathione, major mediator of NLRP3 signalling (Hughes et al. 2019), as well as other  
323 genes involved in the pathway regulation (Barlan et al. 2011; Billon et al. 2019; Guglielmo et al.  
324 2017; Y. He et al. 2016; Hughes et al. 2019; Hughes and O'Neill 2018; Iyer et al. 2013; Jo et al.  
325 2016; Kim et al. 2015; Li et al. 2016; Martine et al. 2019; Mitoma et al. 2013; Palazón-Riquelme et  
326 al. 2018; Shuvarikov et al. 2018; X. Wang et al. 2014; Wolf et al. 2016; T. Zhang et al. 2021; Zhou et  
327 al. 2010), and confirmed the similarities between 16 L and 4 wk HFD for those gene lists, in  
328 opposition to 16 wk HFD (**Figure 4F**). Thus, as presently shown, systemic administration of leptin  
329 activated genes from the NLRP3 inflammasome pathway in CCs, corroborating once more the  
330 functional link between leptin signalling and NLRP3 inflammasome activation in CCs of DIO mice.

#### 331 *4.5 Time-course activation of NLRP3-induced inflammasome in liver of DIO mice*

332 Different organs can uniquely adapt to systemic insults like obesity (Smith et al. 2018).  
333 Therefore, in the last experiment was asked to what extent mounting inflammatory response through  
334 NLRP3 inflammasome activation in the ovaries of DIO mice precede other metabolic organs like the  
335 liver. We analysed the expression profile of NLRP3 inflammasome genes in the liver of DIO mice,

336 besides testing once more the functional link between leptin signalling and activation of NLRP3  
337 inflammasome at hepatic level, using pharmacological hyperleptinemic and *ob/ob* mouse models.  
338 Liver samples were collected from DIO, leptin treated and *ob/ob* female mice, for mRNA  
339 transcription and protein expression analysis (**Figure 5A**). Real-time PCR analysis (n=5-7/group)  
340 showed no significant changes in expression of all inflammasome components, except for the  
341 increase of *Nlrp3* and *Il-1 $\beta$*  mRNA in 16 wk HFD, but downregulation of *Nlrp3* in *ob/ob*-/- (**Figure**  
342 **5B**, p<0.05). Furthermore, protein analysis determined by Western blotting (n=4-8/group) showed an  
343 increase in protein levels of NLRP3, CASP1 (p20), and IL-18 (p18) after 16 wk HFD treatment,  
344 comparing to control (**Figure 5C, E and G**, p=0.07, p<0.05). Regarding the pro-peptide of CASP1  
345 (p45), its protein was upregulated in 16 L, but downregulated in *ob/ob* -/-, comparing to controls  
346 (**Figure 5D**, p<0.05 and p<0.01, respectively). Finally, CASP1 (p20) and IL-18 (p18) proteins were  
347 decreased in *ob/ob*-/- (**Figure 5E, G**, p<0.05 and p=0.08, respectively). No significant changes were  
348 observed for pro-IL-18 (p24). The present results on our analysis in the liver indicate a site dependent  
349 NLRP3 inflammasome regulation throughout obesity, since overexpression of NLRP3, CASP1 (p20)  
350 and IL-18 (p18) took place only at 16 wk of DIO. Differences in NLRP3 inflammasome profile  
351 between liver and ovary certainly relay on the intrinsic immunological complexity the liver presents.  
352 The liver, in opposition to the ovary, is constantly exposed to proinflammatory mediators, having  
353 developed the ability to tightly control inflammation (Robinson, Harmon, and O'Farrelly 2016).  
354 Another important observation was the downregulation of NLRP3 and CASP1 (p20) in livers from  
355 *ob/ob* -/- mice. Other studies corroborated these observations (Negrin et al. 2014), and despite all  
356 intricacies of NLRP3 inflammasome regulation, leptin seems to directly modulate NLRP3  
357 inflammasome activation at hepatic level. Hence, we confirmed the latency of NLRP3 inflammasome  
358 activation in the liver of DIO female mice, which showed signs of upregulation only after 16 wk  
359 HFD treatment. Furthermore, we have confirmed the functional link between leptin and NLRP3  
360 inflammasome activation in the liver.



## 361 **5 Discussion**

362           The present study gives the first characterisation of NLRP3 induced inflammasome activation  
363 in the ovaries of DIO mice. Maternal obesity has been largely associated with increased ovarian  
364 inflammation (J. Nteeba et al. 2013; Jackson Nteeba, Ganesan, and Keating 2014; Robker, Wu, and  
365 Yang 2011; Ruebel et al. 2017; Snider and Wood 2019), being a better knowledge of its pathogenesis  
366 of undeniable value for our understanding of ovarian failure and infertility during obesity. We firstly  
367 confirmed the effects of cyclicity on NLRP3 inflammasome activation in the ovaries of lean mice,  
368 observing the upregulation of NLRP3 inflammasome components in D. Subsequently, we temporally  
369 characterised the expression profile of NLRP3 inflammasome components in the ovary, throughout  
370 obesity progression. Indeed, the rapid upregulation of NLRP3 protein in early obesity (after 4 wk  
371 HFD treatment), was followed by a consistent downregulation of NLRP3 inflammasome  
372 components, as NLRP3 and CASP1, in late obesity (after 16 wk HFD). Importantly, using either a  
373 pharmacological hyperleptinemic and a genetic obese *ob/ob* mouse, we not only evidenced the  
374 functional link between levels of leptin signalling and NLRP3 activation in whole ovaries, but also  
375 the role of leptin on *Nlrp3*, *Il-18* and *Il-1 $\beta$*  gene expression upregulation in CCs from ovulated  
376 follicles. Finally, after analysing the NLRP3 inflammasome expression pattern in the liver, we  
377 confirmed NLRP3 and CASP1 overexpression took place exclusively after 16 wk HFD treatment,  
378 suggesting a delayed activation of NLRP3 inflammasome activation in comparison with the ovary.  
379 Hence, these results suggest a greater vulnerability of the ovaries in general, and the gamete in  
380 particular, to the energetic surplus females face under obesogenic conditions.

381           A recent study by Zhang and colleagues evidenced for the first time NLRP3 expression in  
382 various cellular components like GC, TC and oocytes of mouse ovaries (Z. Zhang, Wang, and Zhang  
383 2019). We presently confirmed not only the similar pattern of cellular expression for NLRP3, but  
384 also the upregulation of NLRP3 inflammasome components during D. These findings corroborate



385 previous results suggesting the involvement of NLRP3 in inflammation during ovulation in mice (Z.  
386 Zhang, Wang, and Zhang 2019). Furthermore, NLRP3 proinflammatory role in ovarian function  
387 starts getting noticed not only under physiological context (Z. Zhang, Wang, and Zhang 2019), but  
388 also as an important mediator of ovarian pathology during ageing (Navarro-Pando et al. 2021).  
389 Certainly, our hypothesis of NLRP3 inflammasome involvement in inflammatory response in the  
390 ovary of obese mothers seems to be supported also by earlier reports showing NLRP3 inflammasome  
391 activation during development and treatment of PCOS (Guo et al. 2020; F. Wang et al. 2017).

392         The NLRP3 inflammasome is a critical component of innate immunity, frequently associated  
393 with human disease (Y. He, Hara, and Núñez 2016). Our results evidencing NLRP3 inflammasome  
394 activation in the ovaries of 4 wk HFD treatment are in line with previous reports showing the  
395 accumulation of proinflammatory mediators in the ovary after short term (6 wk HFD) dietary  
396 protocols (Shen, Xu, and Li 2021). Indeed, we presently observed the upregulation of IL-18 protein,  
397 as well as increased mRNA of *Tnf* (data not shown), after 4 wk HFD underscoring the mounting  
398 inflammatory response. Nonetheless, maintenance of inflammation in the ovaries in long term DIO  
399 mice (after 16 wk HFD) seems to be mediated independently from NLRP3 inflammasome pathway,  
400 as IL-18 and CASP1 mature proteins were significantly downregulated at this time point.  
401 Undeniably, increased levels of IL-1 $\beta$  in the ovaries of 16 wk HFD mice confirm the  
402 proinflammatory state in the ovaries of DIO mice after 16 wk HFD, supported by several studies in  
403 mice showing the abundancy of inflammatory markers like *Il-1 $\beta$* , *Il-6* and *Tnf $\alpha$*  and in the ovary of  
404 long term DIO mice fed for 24 wk HFD (J. Nteeba et al. 2013). As a result, the increased levels of  
405 IL-1 $\beta$  at 16 wk HFD confirm the existence of alternative pathways to NLRP3 inflammasome,  
406 mediating IL-1 $\beta$  upregulation (Donado et al. 2020; Jain et al. 2020; Pyrillou, Burzynski, and Clarke  
407 2020; Schmidt and Lenz 2012; Zhu and Kanneganti 2017). To this extent, we have recently shown  
408 the temporal pattern of expression of proinflammatory genes in CCs from DIO mice (Wołodko et al.

409 2020). In early obesity, inflammatory cues in CCs were mediated by cellular response to stress  
410 through upregulation of genes like *DEAD-box helicase 5 (Ddx5)*, *hypoxia inducible factor 1 subunit*  
411 *alpha (Hif1a)*, *ADAM metalloproteinase domain 9 (Adam9)*. Indeed, mediators of stress response as  
412 ROS are known to prime the NLRP3 inflammasome (Gurung et al. 2014). Subsequently, in late  
413 obesity, we saw the overexpression of genes involved in anatomical structural morphogenesis, as *C-*  
414 *C motif chemokine ligand 7 (Ccl7)*, an important chemoattractant of leukocytes (Menten et al. 1999),  
415 and also known to interact with matrix metalloproteinases (MMPs) (Liu et al. 2018), or complement  
416 C3a receptor 1 (*C3ar1*), a complement component known to mediate neutrophil mobilisation  
417 (Brennan et al. 2019) and lately described as a marker of PCOS progression (D. He et al. 2020).  
418 Therefore, these data suggest important temporal dynamics on the regulation of the inflammatory  
419 response in the ovary throughout obesity progression, with NLRP3 inflammasome playing a critical  
420 role mostly in the initiation of inflammation in the ovaries in early obesity. Conversely, in late  
421 obesity, immune mediated response in the ovary progresses to infiltration of immune cells and  
422 structural reorganisation, independently from the activation of NLRP3 inflammasome.

423 Our study also sheds light on the important crosstalk between leptin signalling and  
424 inflammasome NLRP3 activation in the ovary of DIO mice. As reviewed by Wani and co-workers,  
425 numerous factors were shown to activate NLRP3 inflammasome during obesity, such as cellular  
426 metabolites, carbohydrates or lipids (Wani et al. 2021). Nonetheless, leptin, a conserved  
427 proinflammatory cytokine (Iikuni et al. 2008; La Cava 2017), was recently shown to upregulated  
428 NLRP3 components *in vitro* (Fu et al. 2017). Thus, in order to test the hypothesis whether repression  
429 of NLRP3 inflammasome activation in ovaries of 16 wk HFD mice was due to the establishment of  
430 leptin resistance (Wołodko et al. 2020), we studied NLRP3 inflammasome activation in the ovaries  
431 of pharmacological hyperleptinemic and *ob/ob* mice. Strikingly, we observed a consistent  
432 upregulation of NLRP3 inflammasome genes and accumulation of IL-1 $\beta$  protein in ovaries of leptin

433 treated mice, in opposition to *ob/ob* *-/-* mice which evidenced consistent downregulation of NLRP3  
434 and IL-1 $\beta$  proteins. Furthermore, reduced levels of NLRP3 were also observed in *ob/ob* *-/-* mouse  
435 peritoneal macrophages treated with LPS and nigericin in comparison to wild type mice (Yang et al.  
436 2021), what certainly underlines the preponderant role of leptin on NLRP3 inflammasome regulation.  
437 Therefore, our results invite us to suggest the activation of NLRP3 inflammasome in the ovary of  
438 DIO mice is mediated by leptin signalling. In early obesity (4 wk HFD treatment) leptin actively  
439 signals through receptor b (ObRb) in the ovary (Wołodko et al. 2020), with the overexpression of  
440 NLRP3 inflammasome components; nonetheless, in late obesity (16 wk HFD treatment) after the  
441 establishment of leptin resistance in the organ (Wołodko et al. 2020), expression of NLRP3  
442 inflammasome is drastically repressed.

443         Next, we reanalysed our datasets on global gene expression in CCs collected from  
444 pharmacological hyperleptinemic and DIO mice, in order to test the association between leptin  
445 signalling and activation of NLRP3 inflammasome in the somatic companions of the oocyte.  
446 Importantly, CCs are known as faithful indicators of intrafollicular environment (Wołodko et al.  
447 2021) and their transcriptome has been used to predict oocyte and embryo quality (Uyar, Torrealday,  
448 and Seli 2013). Despite no changes in 4 wk HFD, we confirmed the overexpression of NLRP3  
449 inflammasome genes in CCs from 16 L. Consequently, we interrogated whether DEGs overlapping  
450 both 16 L and 4 wk HFD treatment could interacted with NLRP3 inflammasome genes. Indeed gene  
451 ontology for associated genes revealed key terms for oocyte maturation, as regulation of glucose  
452 transport, response to ATP and regulation of cytokine biosynthesis. Metabolic regulation in  
453 preovulatory follicles appears to control major steps for maturation of female gamete, as meiosis  
454 resumption, chromatin condensation and cytoplasm maturation (Wołodko et al. 2021). For instance,  
455 glucose, which is mostly metabolised in CCs (Sanfins, Rodrigues, and Albertini 2018) was shown to  
456 be key for oocyte competence (Wilding et al. 2009), as well as reduced ATP content in oocytes was

457 linked to failure in fertilisation, arrested division and abnormal embryonic development (J. Zhao and  
458 Li 2012). Furthermore, the aforementioned involvement of NLRP3 inflammasome in ovulation (Z.  
459 Zhang, Wang, and Zhang 2019) can be considered amongst the regulation of the cytokine milieu  
460 locally produced in CCs. Given leptin direct and indirect role in ovulation (Wołodko et al. 2021),  
461 failure in leptin signalling and NLRP3 inflammasome activation in late obesity can account for  
462 increased anovulatory rates in obese mothers (Hou et al. 2016; Wu et al. 2010). Finally, absence of  
463 changes in 4 wk HFD in NLRP3 inflammasome genes can be ascribed to low coverage of our  
464 reduced-cell libraries and also low levels of gene expression. Indeed, the present RNA-seq protocol  
465 used as little as 50 cells per mouse, which has limitations while analysing weakly expressed genes.  
466 Collectively, our results indicate leptin and NLRP3 inflammasome crosstalk in CCs can interfere  
467 with major steps regulating oocyte maturation and early embryo development.

468           In the last experiment we confirmed the liver, in sharp contrast to the ovary, activated NLRP3  
469 inflammasome later in time during DIO protocol (after 16 wk HFD treatment) in mice. Temporal  
470 differences in inflammatory response regulation between both organs certainly rely on contrasting  
471 exposition to exogenous pathogens. The liver is an organ constantly exposed to proinflammatory  
472 mediators from dietary and commensal bacterial products (Robinson, Harmon, and O’Farrelly 2016).  
473 Thus, the hepatic immune system is constantly in contact with altered metabolic activity and regular  
474 exposition to microbial products, which results in persistent and tightly regulated inflammatory  
475 response (Robinson, Harmon, and O’Farrelly 2016). On the contrary, the ovary is not only a highly  
476 immunogenic organ constantly secreting large amounts of cytokines and immune mediators (Piccinni  
477 et al. 2021), but also more prone to rapidly mounting proinflammatory response during obesity.  
478 Indeed, the inability of the ovary to control inflammation and exacerbated cytokine production  
479 certainly ascribes for the great vulnerability the female gamete presents to maternal obesity even at

480 earlier stages. Thus, our results expose the increased ovarian vulnerability to maternal obesity, with a  
481 rapid mounting inflammation which affects the gamete and impairs fertilisation.

482 In summary, our work evidences the major role leptin signalling exerts on NLRP3  
483 inflammasome activity in the ovary of obese mice. Noteworthy, failure in ovarian leptin signalling  
484 was associated with repression in NLRP3 activity, but not decreased inflammation and levels of IL-  
485 1 $\beta$ . Moreover, NLRP3 inflammasome activation in the ovary precedes liver response during obesity  
486 progression suggesting the greater vulnerability the ovary in general, and gamete in particular, to the  
487 energetic surplus during maternal obesity.

#### 488 **Conflict of Interest**

489 The authors have no conflict of interest to declare.

#### 490 **Author Contributions**

491 MA did data acquisition, analysis and interpretation of the data, writing the manuscript; KW did data  
492 acquisition and analysis and revised and edited the manuscript; JO did immunohistochemistry  
493 staining; JCF conducted data analysis and interpretation of data, revising the manuscript; DM did  
494 immunohistochemistry staining; GK revised and edited the manuscript; AG conceptualised and  
495 designed the study, acquired the funding, participated in data acquisition, analysis and interpretation,  
496 and wrote and edited the manuscript.

#### 497 **Funding**

498 Work supported by grants from the Polish National Science Centre (No. 2016/23/B/NZ4/03737 and  
499 2019/34/E/NZ4/00349) awarded to A. G.; A. G. was supported by Horizon 2020 Marie Curie  
500 Individual Fellowship (MOBER, 2017-2019) and by the KNOW Consortium: “Healthy Animal -  
501 Safe Food” (Ministry of Sciences and Higher Education; Dec: 05-1/KNOW2/2015).

502 **Acknowledgments**

503 We would like to thank Dr Leslie Paul Kozak and Dr Magdalena Jura for their support with the  
504 validation and characterisation of the mouse obese phenotype; and Dr Krzysztof Witek for his  
505 support with the imaging and confocal microscopy.

506 **Data Availability Statement**

507 The raw data supporting the conclusions of this article were made available within the publication  
508 Wołodko et al 2020.

509

510

511

512

513

514

515

516

517

518

519

520

521

## 522 References

- 523 Barlan, A. U., T. M. Griffin, K. A. McGuire, and C. M. Wiethoff. 2011. 'Adenovirus Membrane  
524 Penetration Activates the NLRP3 Inflammasome'. *Journal of Virology* 85 (1): 146–55.  
525 <https://doi.org/10.1128/JVI.01265-10>.
- 526 Billon, Cyrielle, Meghan H. Murray, Amer Avdagic, and Thomas P. Burris. 2019. 'ROR $\gamma$  Regulates  
527 the NLRP3 Inflammasome'. *The Journal of Biological Chemistry* 294 (1): 10–19.  
528 <https://doi.org/10.1074/jbc.AC118.002127>.
- 529 Boden, Guenther. 2002. 'Interaction between Free Fatty Acids and Glucose Metabolism'. *Current*  
530 *Opinion in Clinical Nutrition and Metabolic Care* 5 (5): 545–49.  
531 <https://doi.org/10.1097/00075197-200209000-00014>.
- 532 Brennan, Faith H., Trisha Jogia, Ellen R. Gillespie, Linda V. Blomster, Xaria X. Li, Bianca Nowlan,  
533 Gail M. Williams, et al. 2019. 'Complement Receptor C3aR1 Controls Neutrophil  
534 Mobilization Following Spinal Cord Injury through Physiological Antagonism of CXCR2'.  
535 *JCI Insight* 4 (9). <https://doi.org/10.1172/jci.insight.98254>.
- 536 Cauble, Reagan, S. Hamad, Ellen Herring, Callan Lichtenwalter, C. McGuire, and Sami Dridi. 2018.  
537 'Leptin Activates NLRP3 Inflammasome-Associated with Type II Diabetes and Obesity'.  
538 *Advances in Food Technology and Nutritional Sciences - Open Journal* 4 (November): e13–  
539 16. <https://doi.org/10.17140/AFTNSOJ-4-e016>.
- 540 Chang, Hsun-Ming, Jie Qiao, and Peter C.K. Leung. 2017. 'Oocyte–Somatic Cell Interactions in the  
541 Human Ovary—Novel Role of Bone Morphogenetic Proteins and Growth Differentiation  
542 Factors'. *Human Reproduction Update* 23 (1): 1–18.  
543 <https://doi.org/10.1093/humupd/dmw039>.
- 544 Chaves de Souza, João Antônio, Andressa Vilas Boas Nogueira, Pedro Paulo Chaves de Souza, Yeon  
545 Jung Kim, Caroline Silva Lobo, Guilherme José Pimentel Lopes de Oliveira, Joni Augusto  
546 Cirelli, Gustavo Pompermaier Garlet, and Carlos Rossa. 2013. 'SOCS3 Expression Correlates  
547 with Severity of Inflammation, Expression of Proinflammatory Cytokines, and Activation of  
548 STAT3 and P38 MAPK in LPS-Induced Inflammation In Vivo'. *Mediators of Inflammation*  
549 2013. <https://doi.org/10.1155/2013/650812>.
- 550 Chu, Susan Y., Shin Y. Kim, Joseph Lau, Christopher H. Schmid, Patricia M. Dietz, William M.  
551 Callaghan, and Kathryn M. Curtis. 2007. 'Maternal Obesity and Risk of Stillbirth: A  
552 Metaanalysis'. *American Journal of Obstetrics and Gynecology* 197 (3): 223–28.  
553 <https://doi.org/10.1016/j.ajog.2007.03.027>.
- 554 Davis, Beckley K., Haitao Wen, and Jenny P.-Y. Ting. 2011. 'The Inflammasome NLRs in  
555 Immunity, Inflammation, and Associated Diseases'. *Annual Review of Immunology* 29: 707–  
556 35. <https://doi.org/10.1146/annurev-immunol-031210-101405>.
- 557 De Nardo, Dominic, and Eicke Latz. 2011. 'NLRP3 Inflammasomes Link Inflammation and  
558 Metabolic Disease'. *Trends in Immunology* 32 (8): 373–79.  
559 <https://doi.org/10.1016/j.it.2011.05.004>.
- 560 Donado, Carlos A., Anh B. Cao, Daimon P. Simmons, Ben A. Croker, Patrick J. Brennan, and  
561 Michael B. Brenner. 2020. 'A Two-Cell Model for IL-1 $\beta$  Release Mediated by Death-  
562 Receptor Signaling'. *Cell Reports* 31 (1): 107466.  
563 <https://doi.org/10.1016/j.celrep.2020.03.030>.



- 564 Fu, Sisi, Lei Liu, Lei Han, and Yiyun Yu. 2017. 'Leptin Promotes IL-18 Secretion by Activating the  
565 NLRP3 Inflammasome in RAW 264.7 Cells'. *Molecular Medicine Reports* 16 (6): 9770–76.  
566 <https://doi.org/10.3892/mmr.2017.7797>.
- 567 Galvão, António, Sofia Henriques, Daria Pestka, Karolina Lukasik, Dariusz Skarzynski, Luisa Maria  
568 Mateus, and Graça Maria Leitao Ferreira-Dias. 2012. 'Equine Luteal Function Regulation  
569 May Depend on the Interaction between Cytokines and Vascular Endothelial Growth Factor:  
570 An in Vitro Study'. *Biology of Reproduction* 86 (6): 187.  
571 <https://doi.org/10.1095/biolreprod.111.097147>.
- 572 Galvão, António, Angela Tramontano, Maria Rosa Rebordão, Ana Amaral, Pedro Pinto Bravo, Anna  
573 Szóstek, Dariusz Skarzynski, Antonio Mollo, and Graça Ferreira-Dias. 2014. 'Opposing  
574 Roles of Leptin and Ghrelin in the Equine Corpus Luteum Regulation: An In Vitro Study'.  
575 *Mediators of Inflammation* 2014 (July): e682193. <https://doi.org/10.1155/2014/682193>.
- 576 Guglielmo, Andrew, Adham Sabra, Mostafa Elbery, Milena M. Cerveira, Fernanda Ghenov, Rajesh  
577 Sunasee, and Karina Ckless. 2017. 'A Mechanistic Insight into Curcumin Modulation of the  
578 IL-1 $\beta$  Secretion and NLRP3 S-Glutathionylation Induced by Needle-like Cationic Cellulose  
579 Nanocrystals in Myeloid Cells'. *Chemico-Biological Interactions* 274 (August): 1–12.  
580 <https://doi.org/10.1016/j.cbi.2017.06.028>.
- 581 Guo, Qing-Jun, Jing Shan, Yi-Feng Xu, Yan-Yan Hu, Cui-Lan Huo, Jing-Yun Song, Chao-Qun  
582 Wang, Hui Zhou, Chao-Qin Yu, and Qin Huang. 2020. 'Pioglitazone Metformin Complex  
583 Improves Polycystic Ovary Syndrome Comorbid Psychological Distress via Inhibiting  
584 NLRP3 Inflammasome Activation: A Prospective Clinical Study'. *Mediators of Inflammation*  
585 2020: 3050487. <https://doi.org/10.1155/2020/3050487>.
- 586 Gurung, Prajwal, Paras K. Anand, R. K. Subbarao Malireddi, Lieselotte Vande Walle, Nina Van  
587 Opendenbosch, Christopher P. Dillon, Ricardo Weinlich, Douglas R. Green, Mohamed  
588 Lamkanfi, and Thirumala-Devi Kanneganti. 2014. 'FADD and Caspase-8 Mediate Priming  
589 and Activation of the Canonical and Noncanonical Nlrp3 Inflammasomes'. *Journal of*  
590 *Immunology (Baltimore, Md.: 1950)* 192 (4): 1835–46.  
591 <https://doi.org/10.4049/jimmunol.1302839>.
- 592 Hasegawa, Ayumi, Keiji Mochida, Hiroki Inoue, Yoshihiro Noda, Tamao Endo, Gen Watanabe, and  
593 Atsuo Ogura. 2016. 'High-Yield Superovulation in Adult Mice by Anti-Inhibin Serum  
594 Treatment Combined with Estrous Cycle Synchronization<sup>1</sup>'. *Biology of Reproduction* 94 (21,  
595 1–8). <https://doi.org/10.1095/biolreprod.115.134023>.
- 596 He, Dongyun, Li Liu, Yang Wang, and Minjia Sheng. 2020. 'A Novel Genes Signature Associated  
597 with the Progression of Polycystic Ovary Syndrome'. *Pathology Oncology Research: POR* 26  
598 (1): 575–82. <https://doi.org/10.1007/s12253-019-00676-3>.
- 599 He, Yuan, Hideki Hara, and Gabriel Núñez. 2016. 'Mechanism and Regulation of NLRP3  
600 Inflammasome Activation'. *Trends in Biochemical Sciences* 41 (12): 1012–21.  
601 <https://doi.org/10.1016/j.tibs.2016.09.002>.
- 602 He, Yuan, Melody Y. Zeng, Dahai Yang, Benny Motro, and Gabriel Núñez. 2016. 'NEK7 Is an  
603 Essential Mediator of NLRP3 Activation Downstream of Potassium Efflux'. *Nature* 530  
604 (7590): 354–57. <https://doi.org/10.1038/nature16959>.
- 605 Hotamisligil, Gökhan S., and Ebru Erbay. 2008. 'Nutrient Sensing and Inflammation in Metabolic  
606 Diseases'. *Nature Reviews Immunology* 8 (12): 923–34. <https://doi.org/10.1038/nri2449>.
- 607 Hou, Yan-Jun, Cheng-Cheng Zhu, Xing Duan, Hong-Lin Liu, Qiang Wang, and Shao-Chen Sun.  
608 2016. 'Both Diet and Gene Mutation Induced Obesity Affect Oocyte Quality in Mice'.  
609 *Scientific Reports* 6 (1): 18858. <https://doi.org/10.1038/srep18858>.
- 610 Hughes, Mark M., Alexander Hooftman, Stefano Angiari, Padmaja Tummala, Zbigniew Zaslona,  
611 Marah C. Runtsch, Anne F. McGettrick, et al. 2019. 'Glutathione Transferase Omega-1



- 612 Regulates NLRP3 Inflammasome Activation through NEK7 Deglutathionylation'. *Cell*  
613 *Reports* 29 (1): 151-161.e5. <https://doi.org/10.1016/j.celrep.2019.08.072>.
- 614 Hughes, Mark M., and Luke A. J. O'Neill. 2018. 'Metabolic Regulation of NLRP3'. *Immunological*  
615 *Reviews* 281 (1): 88-98. <https://doi.org/10.1111/imr.12608>.
- 616 Iikuni, Noriko, Queenie Lai Kwan Lam, Liwei Lu, Giuseppe Matarese, and Antonio La Cava. 2008.  
617 'Leptin and Inflammation'. *Current Immunology Reviews* 4 (2): 70-79.  
618 <https://doi.org/10.2174/157339508784325046>.
- 619 Iyer, Shankar S., Qiong He, John R. Janczy, Eric I. Elliott, Zhenyu Zhong, Alicia K. Olivier, Jeffrey  
620 J. Sadler, et al. 2013. 'Mitochondrial Cardiolipin Is Required for Nlrp3 Inflammasome  
621 Activation'. *Immunity* 39 (2): 311-23. <https://doi.org/10.1016/j.immuni.2013.08.001>.
- 622 Jain, Aakanksha, Ricardo A. Irizarry-Caro, Margaret M. McDaniel, Amanpreet Singh Chawla,  
623 Kaitlin R. Carroll, Garrett R. Overcast, Naomi H. Philip, et al. 2020. 'T Cells Instruct  
624 Myeloid Cells to Produce Inflammasome-Independent IL-1 $\beta$  and Cause Autoimmunity'.  
625 *Nature Immunology* 21 (1): 65-74. <https://doi.org/10.1038/s41590-019-0559-y>.
- 626 Jo, Eun-Kyeong, Jin Kyung Kim, Dong-Min Shin, and Chihiro Sasakawa. 2016. 'Molecular  
627 Mechanisms Regulating NLRP3 Inflammasome Activation'. *Cellular and Molecular*  
628 *Immunology* 13 (2): 148-59. <https://doi.org/10.1038/cmi.2015.95>.
- 629 Jungheim, Emily S., Erica L. Schoeller, Kerri L. Marquard, Erica D. Loudon, Jean E. Schaffer, and  
630 Kelle H. Moley. 2010. 'Diet-Induced Obesity Model: Abnormal Oocytes and Persistent  
631 Growth Abnormalities in the Offspring'. *Endocrinology* 151 (8): 4039-46.  
632 <https://doi.org/10.1210/en.2010-0098>.
- 633 Kim, So Ri, Yong Chul Lee, Hee Jung Kim, and Soon Ha Kim. 2015. 'Activation of NLRP3  
634 Inflammasome Is Regulated by Mitochondrial ROS via PI3K-HIF-VEGF Pathway in Acute  
635 Lung Injury'. *European Respiratory Journal* 46 (suppl 59).  
636 <https://doi.org/10.1183/13993003.congress-2015.PA3026>.
- 637 Krebs, M., and M. Roden. 2005. 'Molecular Mechanisms of Lipid-Induced Insulin Resistance in  
638 Muscle, Liver and Vasculature'. *Diabetes, Obesity & Metabolism* 7 (6): 621-32.  
639 <https://doi.org/10.1111/j.1463-1326.2004.00439.x>.
- 640 Kyrölahti, Antti, Melanie Vetter, Rosemarie Euler, Malgorzata Bielinska, Patrick Y. Jay, Mikko  
641 Anttonen, Markku Heikinheimo, and David B. Wilson. 2011. 'GATA4 Deficiency Impairs  
642 Ovarian Function in Adult Mice'. *Biology of Reproduction* 84 (5): 1033-44.  
643 <https://doi.org/10.1095/biolreprod.110.086850>.
- 644 La Cava, Antonio. 2017. 'Leptin in Inflammation and Autoimmunity'. *Cytokine* 98 (October): 51-58.  
645 <https://doi.org/10.1016/j.cyto.2016.10.011>.
- 646 Lamkanfi, Mohamed. 2011. 'Emerging Inflammasome Effector Mechanisms'. *Nature Reviews*  
647 *Immunology* 11 (3): 213-20. <https://doi.org/10.1038/nri2936>.
- 648 Lamkanfi, Mohamed, and Vishva M. Dixit. 2014. 'Mechanisms and Functions of Inflammasomes'.  
649 *Cell* 157 (5): 1013-22. <https://doi.org/10.1016/j.cell.2014.04.007>.
- 650 Li, Yi, Jia-Yi Zheng, Jian-Qun Liu, Jie Yang, Yang Liu, Chen Wang, Xiao-Nan Ma, Bao-Lin Liu,  
651 Gui-Zhong Xin, and Li-Fang Liu. 2016. 'Succinate/NLRP3 Inflammasome Induces Synovial  
652 Fibroblast Activation: Therapeutical Effects of Clematichinenoside AR on Arthritis'.  
653 *Frontiers in Immunology* 7 (December). <https://doi.org/10.3389/fimmu.2016.00532>.
- 654 Liu, Yangyang, Yadi Cai, Li Liu, Yudong Wu, and Xiangyang Xiong. 2018. 'Crucial Biological  
655 Functions of CCL7 in Cancer'. *PeerJ* 6: e4928. <https://doi.org/10.7717/peerj.4928>.
- 656 Lukens, John R., Jordan M. Gross, Christopher Calabrese, Yoichiro Iwakura, Mohamed Lamkanfi,  
657 Peter Vogel, and Thirumala-Devi Kanneganti. 2014. 'Critical Role for Inflammasome-  
658 Independent IL-1 $\beta$  Production in Osteomyelitis'. *Proceedings of the National Academy of*  
659 *Sciences* 111 (3): 1066-71. <https://doi.org/10.1073/pnas.1318688111>.

- 660 Martine, Pierre, Angélique Chevriaux, Valentin Derangère, Lionel Apetoh, Carmen Garrido,  
661 François Ghiringhelli, and Cédric Rébé. 2019. 'HSP70 Is a Negative Regulator of NLRP3  
662 Inflammasome Activation'. *Cell Death & Disease* 10 (4): 1–11.  
663 <https://doi.org/10.1038/s41419-019-1491-7>.
- 664 Martinon, Fabio, Kimberly Burns, and Jürg Tschopp. 2002. 'The Inflammasome: A Molecular  
665 Platform Triggering Activation of Inflammatory Caspases and Processing of ProIL-Beta'.  
666 *Molecular Cell* 10 (2): 417–26. [https://doi.org/10.1016/s1097-2765\(02\)00599-3](https://doi.org/10.1016/s1097-2765(02)00599-3).
- 667 Martinon, Fabio, Virginie Pétrilli, Annick Mayor, Aubry Tardivel, and Jürg Tschopp. 2006. 'Gout-  
668 Associated Uric Acid Crystals Activate the NALP3 Inflammasome'. *Nature* 440 (7081): 237–  
669 41. <https://doi.org/10.1038/nature04516>.
- 670 Menten, P., P. Proost, S. Struyf, E. Van Coillie, W. Put, J. P. Lenaerts, R. Conings, et al. 1999.  
671 'Differential Induction of Monocyte Chemotactic Protein-3 in Mononuclear Leukocytes and  
672 Fibroblasts by Interferon-Alpha/Beta and Interferon-Gamma Reveals MCP-3 Heterogeneity'.  
673 *European Journal of Immunology* 29 (2): 678–85. [https://doi.org/10.1002/\(SICI\)1521-4141\(199902\)29:02<678::AID-IMMU678>3.0.CO;2-J](https://doi.org/10.1002/(SICI)1521-4141(199902)29:02<678::AID-IMMU678>3.0.CO;2-J).
- 674  
675 Minge, Cadence E., Brenton D. Bennett, Robert J. Norman, and Rebecca L. Robker. 2008.  
676 'Peroxisome Proliferator-Activated Receptor-Gamma Agonist Rosiglitazone Reverses the  
677 Adverse Effects of Diet-Induced Obesity on Oocyte Quality'. *Endocrinology* 149 (5): 2646–  
678 56. <https://doi.org/10.1210/en.2007-1570>.
- 679 Mitoma, Hiroki, Shino Hanabuchi, Taeil Kim, Musheng Bao, Zhiqiang Zhang, Naoshi Sugimoto, and  
680 Yong-Jun Liu. 2013. 'The DEAH Box RNA Helicase DHX33 Senses Cytosolic RNA and  
681 Activates the NLRP3 Inflammasome'. *Immunity* 39 (1): 123–35.  
682 <https://doi.org/10.1016/j.immuni.2013.07.001>.
- 683 Navarro-Pando, José M., Elisabet Alcocer-Gómez, Beatriz Castejón-Vega, Elena Navarro-Villarán,  
684 Mónica Condés-Hervás, María Mundi-Roldan, Jordi Muntané, et al. 2021. 'Inhibition of the  
685 NLRP3 Inflammasome Prevents Ovarian Aging'. *Science Advances* 7 (1): eabc7409.  
686 <https://doi.org/10.1126/sciadv.abc7409>.
- 687 Negrin, Kimberly A., Rachel J. Roth Flach, Marina T. DiStefano, Anouch Matevossian, Randall H.  
688 Friedline, DaeYoung Jung, Jason K. Kim, and Michael P. Czech. 2014. 'IL-1 Signaling in  
689 Obesity-Induced Hepatic Lipogenesis and Steatosis'. *PLOS ONE* 9 (9): e107265.  
690 <https://doi.org/10.1371/journal.pone.0107265>.
- 691 Nigam, Sanjay K. 2018. 'The SLC22 Transporter Family: A Paradigm for the Impact of Drug  
692 Transporters on Metabolic Pathways, Signaling, and Disease'. *Annual Review of*  
693 *Pharmacology and Toxicology* 58 (January): 663–87. <https://doi.org/10.1146/annurev-pharmtox-010617-052713>.
- 694  
695 Nteeba, J., L. C. Ortinou, J. W. Perfield, and A. F. Keating. 2013. 'Diet-Induced Obesity Alters  
696 Immune Cell Infiltration and Expression of Inflammatory Cytokine Genes in Mouse Ovarian  
697 and Peri-Ovarian Adipose Depot Tissues'. *Molecular Reproduction and Development* 80  
698 (11): 948–58. <https://doi.org/10.1002/mrd.22231>.
- 699 Nteeba, Jackson, Shanthi Ganesan, and Aileen F. Keating. 2014. 'Progressive Obesity Alters Ovarian  
700 Folliculogenesis with Impacts on Pro-Inflammatory and Steroidogenic Signaling in Female  
701 Mice'. *Biology of Reproduction* 91 (86, 1–11).  
702 <https://doi.org/10.1095/biolreprod.114.121343>.
- 703 Odegaard, Justin I., and Ajay Chawla. 2008. 'Mechanisms of Macrophage Activation in Obesity-  
704 Induced Insulin Resistance'. *Nature Clinical Practice. Endocrinology & Metabolism* 4 (11):  
705 619–26. <https://doi.org/10.1038/ncpendmet0976>.
- 706 Palazón-Riquelme, Pablo, Jonathan D Worboys, Jack Green, Ana Valera, Fatima Martín-Sánchez,  
707 Carolina Pellegrini, David Brough, and Gloria López-Castejón. 2018. 'USP7 and USP47

- 708 Deubiquitinases Regulate NLRP3 Inflammasome Activation'. *EMBO Reports* 19 (10):  
709 e44766. <https://doi.org/10.15252/embr.201744766>.
- 710 Penzias, Alan S. 2012. 'Recurrent IVF Failure: Other Factors'. *Fertility and Sterility* 97 (5): 1033–  
711 38. <https://doi.org/10.1016/j.fertnstert.2012.03.017>.
- 712 Piccinni, Marie-Pierre, Rossella Vicenti, Federica Logiodice, Raffaella Fabbri, Ornella Kullolli,  
713 Marco Pallecchi, Roberto Paradisi, et al. 2021. 'Description of the Follicular Fluid Cytokine  
714 and Hormone Profiles in Human Physiological Natural Cycles'. *The Journal of Clinical  
715 Endocrinology & Metabolism* 106 (2): e721–38. <https://doi.org/10.1210/clinem/dgaa880>.
- 716 Pyrrillou, Katerina, Laura C. Burzynski, and Murray C. H. Clarke. 2020. 'Alternative Pathways of IL-  
717 1 Activation, and Its Role in Health and Disease'. *Frontiers in Immunology* 11.  
718 <https://doi.org/10.3389/fimmu.2020.613170>.
- 719 Ranson, Nicole, Mark Veldhuis, Brent Mitchell, Scott Fanning, Anthony L. Cook, Dale Kunde, and  
720 Rajaraman Eri. 2018. 'NLRP3-Dependent and -Independent Processing of Interleukin (IL)-1 $\beta$   
721 in Active Ulcerative Colitis'. *International Journal of Molecular Sciences* 20 (1).  
722 <https://doi.org/10.3390/ijms20010057>.
- 723 Robinson, Mark W., Cathal Harmon, and Cliona O'Farrelly. 2016. 'Liver Immunology and Its Role  
724 in Inflammation and Homeostasis'. *Cellular & Molecular Immunology* 13 (3): 267–76.  
725 <https://doi.org/10.1038/cmi.2016.3>.
- 726 Robker, Rebecca L. 2008. 'Evidence That Obesity Alters the Quality of Oocytes and Embryos'.  
727 *Pathophysiology: The Official Journal of the International Society for Pathophysiology* 15  
728 (2): 115–21. <https://doi.org/10.1016/j.pathophys.2008.04.004>.
- 729 Robker, Rebecca L., Linda L. -Y. Wu, and Xing Yang. 2011. 'Inflammatory Pathways Linking  
730 Obesity and Ovarian Dysfunction'. *Journal of Reproductive Immunology*, XI International  
731 Congress of Reproductive Immunology, 88 (2): 142–48.  
732 <https://doi.org/10.1016/j.jri.2011.01.008>.
- 733 Rostamtabar, Maryam, Sedighe Esmaeilzadeh, Ahmad Karkhah, Mania Amiri, Abolfazl Rahmani,  
734 Fatemeh Bakouei, and Hamid Reza Nouri. 2020. 'Elevated Expression of IL-18 but Not IL-1 $\beta$   
735 Gene Is Associated with NALP3 and AIM2 Inflammasome in Polycystic Ovary Syndrome'.  
736 *Gene* 731 (March): 144352. <https://doi.org/10.1016/j.gene.2020.144352>.
- 737 Ruebel, Meghan L., Matthew Cotter, Clark R. Sims, Dean M. Moutos, Thomas M. Badger, Mario A.  
738 Cleves, Kartik Shankar, and Aline Andres. 2017. 'Obesity Modulates Inflammation and Lipid  
739 Metabolism Oocyte Gene Expression: A Single-Cell Transcriptome Perspective'. *The Journal  
740 of Clinical Endocrinology and Metabolism* 102 (6): 2029–38. [https://doi.org/10.1210/jc.2016-  
3524](https://doi.org/10.1210/jc.2016-<br/>741 3524).
- 742 Samuelsson, Anne-Maj, Phillippa A. Matthews, Marco Argenton, Michael R. Christie, Josie M.  
743 McConnell, Eugene H. J. M. Jansen, Aldert H. Piersma, et al. 2008. 'Diet-Induced Obesity in  
744 Female Mice Leads to Offspring Hyperphagia, Adiposity, Hypertension, and Insulin  
745 Resistance: A Novel Murine Model of Developmental Programming'. *Hypertension (Dallas,  
746 Tex.: 1979)* 51 (2): 383–92. <https://doi.org/10.1161/HYPERTENSIONAHA.107.101477>.
- 747 Sanfins, Alexandra, Patrícia Rodrigues, and David F. Albertini. 2018. 'GDF-9 and BMP-15 Direct  
748 the Follicle Symphony'. *Journal of Assisted Reproduction and Genetics* 35 (10): 1741–50.  
749 <https://doi.org/10.1007/s10815-018-1268-4>.
- 750 Schmidt, Rebecca L., and Laurel L. Lenz. 2012. 'Distinct Licensing of IL-18 and IL-1 $\beta$  Secretion in  
751 Response to NLRP3 Inflammasome Activation'. *PLOS ONE* 7 (9): e45186.  
752 <https://doi.org/10.1371/journal.pone.0045186>.
- 753 Shao, Bo-Zong, Zhe-Qi Xu, Bin-Ze Han, Ding-Feng Su, and Chong Liu. 2015. 'NLRP3  
754 Inflammasome and Its Inhibitors: A Review'. *Frontiers in Pharmacology* 6 (November).  
755 <https://doi.org/10.3389/fphar.2015.00262>.

- 756 Shen, Hao-Ran, Xiao Xu, and Xue-Lian Li. 2021. 'Berberine Exerts a Protective Effect on Rats with  
757 Polycystic Ovary Syndrome by Inhibiting the Inflammatory Response and Cell Apoptosis'.  
758 *Reproductive Biology and Endocrinology* 19 (1): 3. [https://doi.org/10.1186/s12958-020-](https://doi.org/10.1186/s12958-020-00684-y)  
759 00684-y.
- 760 Shuvarikov, Andrey A., Michael A. Davis, Katharina Esser-Nobis, and Michael J. Gale. 2018.  
761 'Mitochondrial SLC25 Proteins Interact with NLRP3 to Regulate Inflammasome Function'.  
762 *The Journal of Immunology* 200 (1 Supplement): 115.8-115.8.
- 763 Smith, Reuben L, Maarten R Soeters, Rob C I Wüst, and Riekelt H Houtkooper. 2018. 'Metabolic  
764 Flexibility as an Adaptation to Energy Resources and Requirements in Health and Disease'.  
765 *Endocrine Reviews* 39 (4): 489–517. <https://doi.org/10.1210/er.2017-00211>.
- 766 Snider, Alexandria P., and Jennifer R. Wood. 2019. 'Obesity Induces Ovarian Inflammation and  
767 Reduces Oocyte Quality'. *Reproduction (Cambridge, England)* 158 (3): R79–90.  
768 <https://doi.org/10.1530/REP-18-0583>.
- 769 Stienstra, Rinke, Cees J. Tack, Thirumala-Devi Kanneganti, Leo A. B. Joosten, and Mihai G. Netea.  
770 2012. 'The Inflammasome Puts Obesity in the Danger Zone'. *Cell Metabolism* 15 (1): 10–18.  
771 <https://doi.org/10.1016/j.cmet.2011.10.011>.
- 772 Tőzsér, József, and Szilvia Benkő. 2016. 'Natural Compounds as Regulators of NLRP3  
773 Inflammasome-Mediated IL-1 $\beta$  Production'. *Mediators of Inflammation* 2016: 5460302.  
774 <https://doi.org/10.1155/2016/5460302>.
- 775 Traba, Javier, and Michael N. Sack. 2017. 'The Role of Caloric Load and Mitochondrial  
776 Homeostasis in the Regulation of the NLRP3 Inflammasome'. *Cellular and Molecular Life  
777 Sciences: CMLS* 74 (10): 1777–91. <https://doi.org/10.1007/s00018-016-2431-7>.
- 778 Uyar, Asli, Saioa Torrealday, and Emre Seli. 2013. 'Cumulus and Granulosa Cell Markers of Oocyte  
779 and Embryo Quality'. *Fertility and Sterility* 99 (4): 979–97.  
780 <https://doi.org/10.1016/j.fertnstert.2013.01.129>.
- 781 Wang, F., S. Wang, Z. Zhang, Q. Lin, Y. Liu, Y. Xiao, K. Xiao, and Zhengchao Wang. 2017.  
782 'Activation of NLRP3 Inflammasome in the Ovaries during the Development and Treatment  
783 of Polycystic Ovary Syndrome'. *International Journal of Clinical and Experimental  
784 Pathology* 10 (January): 5022–30.
- 785 Wang, Xiaqiong, Wei Jiang, Yiqing Yan, Tao Gong, Jiahuai Han, Zhigang Tian, and Rongbin Zhou.  
786 2014. 'RNA Viruses Promote Activation of the NLRP3 Inflammasome through a RIP1-RIP3-  
787 DRP1 Signaling Pathway'. *Nature Immunology* 15 (12): 1126–33.  
788 <https://doi.org/10.1038/ni.3015>.
- 789 Wani, Kaiser, Hind AlHarthi, Amani Alghamdi, Shaun Sabico, and Nasser M. Al-Daghri. 2021.  
790 'Role of NLRP3 Inflammasome Activation in Obesity-Mediated Metabolic Disorders'.  
791 *International Journal of Environmental Research and Public Health* 18 (2).  
792 <https://doi.org/10.3390/ijerph18020511>.
- 793 Weber, Alexander N. R., Zsófia A. Bittner, Sangeetha Shankar, Xiao Liu, Tzu-Hsuan Chang,  
794 Tengchuan Jin, and Ana Tapia-Abellán. 2020. 'Recent Insights into the Regulatory Networks  
795 of NLRP3 Inflammasome Activation'. *Journal of Cell Science* 133 (jcs248344).  
796 <https://doi.org/10.1242/jcs.248344>.
- 797 Wen, Haitao, Denis Gris, Yu Lei, Sushmita Jha, Lu Zhang, Max Tze-Han Huang, Willie June  
798 Brickey, and Jenny P.-Y. Ting. 2011. 'Fatty Acid-Induced NLRP3-ASC Inflammasome  
799 Activation Interferes with Insulin Signaling'. *Nature Immunology* 12 (5): 408–15.  
800 <https://doi.org/10.1038/ni.2022>.
- 801 Wilding, Martin, Gianfranco Coppola, Brian Dale, and Loredana Di Matteo. 2009. 'Mitochondria  
802 and Human Preimplantation Embryo Development'. *Reproduction (Cambridge, England)* 137  
803 (4): 619–24. <https://doi.org/10.1530/REP-08-0444>.



- 804 Wolf, Andrea J., Christopher N. Reyes, Wenbin Liang, Courtney Becker, Kenichi Shimada, Matthew  
805 L. Wheeler, Hee Cheol Cho, et al. 2016. 'Hexokinase Is an Innate Immune Receptor for the  
806 Detection of Bacterial Peptidoglycan'. *Cell* 166 (3): 624–36.  
807 <https://doi.org/10.1016/j.cell.2016.05.076>.
- 808 Wołodko, Karolina, Juan Castillo-Fernandez, Gavin Kelsey, and António Galvão. 2021. 'Revisiting  
809 the Impact of Local Leptin Signaling in Folliculogenesis and Oocyte Maturation in Obese  
810 Mothers'. *International Journal of Molecular Sciences* 22 (8).  
811 <https://doi.org/10.3390/ijms22084270>.
- 812 Wołodko, Karolina, Edyta Walewska, Marek Adamowski, Juan Castillo-Fernandez, Gavin Kelsey,  
813 and António Galvão. 2020. 'Leptin Resistance in the Ovary of Obese Mice Is Associated with  
814 Profound Changes in the Transcriptome of Cumulus Cells'. *Cellular Physiology and  
815 Biochemistry: International Journal of Experimental Cellular Physiology, Biochemistry, and  
816 Pharmacology* 54 (3): 417–37. <https://doi.org/10.33594/000000228>.
- 817 Wu, Linda Lin-Yan, Kylie R. Dunning, Xing Yang, Darryl L. Russell, Michelle Lane, Robert J.  
818 Norman, and Rebecca L. Robker. 2010. 'High-Fat Diet Causes Lipotoxicity Responses in  
819 Cumulus–Oocyte Complexes and Decreased Fertilization Rates'. *Endocrinology* 151 (11):  
820 5438–45. <https://doi.org/10.1210/en.2010-0551>.
- 821 Yamaguchi, A., O. Hori, D. M. Stern, E. Hartmann, S. Ogawa, and M. Tohyama. 1999. 'Stress-  
822 Associated Endoplasmic Reticulum Protein 1 (SERP1)/Ribosome-Associated Membrane  
823 Protein 4 (RAMP4) Stabilizes Membrane Proteins during Stress and Facilitates Subsequent  
824 Glycosylation'. *The Journal of Cell Biology* 147 (6): 1195–1204.  
825 <https://doi.org/10.1083/jcb.147.6.1195>.
- 826 Yang, Ching-Chun, Chih-Hsing Wu, Ta-Chun Lin, Yi-Ning Cheng, Chin-Sung Chang, Kuo-Ting  
827 Lee, Pei-Jane Tsai, and Yau-Sheng Tsai. 2021. 'Inhibitory Effect of PPAR $\gamma$  on NLRP3  
828 Inflammasome Activation'. *Theranostics* 11 (5): 2424–41.  
829 <https://doi.org/10.7150/thno.46873>.
- 830 Zhang, Tianli, Hiroyasu Tsutsuki, Waliul Islam, Katsuhiko Ono, Kohsuke Takeda, Takaaki Akaike,  
831 and Tomohiro Sawa. 2021. 'ATP Exposure Stimulates Glutathione Efflux as a Necessary  
832 Switch for NLRP3 Inflammasome Activation'. *Redox Biology* 41 (May): 101930.  
833 <https://doi.org/10.1016/j.redox.2021.101930>.
- 834 Zhang, Zhenghong, Fan Wang, and Yan Zhang. 2019. 'Expression and Contribution of NLRP3  
835 Inflammasome During the Follicular Development Induced by PMSG'. *Frontiers in Cell and  
836 Developmental Biology* 7. <https://doi.org/10.3389/fcell.2019.00256>.
- 837 Zhao, J., and Y. Li. 2012. 'Adenosine Triphosphate Content in Human Unfertilized Oocytes,  
838 Undivided Zygotes and Embryos Unsuitable for Transfer or Cryopreservation'. *The Journal  
839 of International Medical Research* 40 (2): 734–39.  
840 <https://doi.org/10.1177/147323001204000238>.
- 841 Zhao, Sheng, and Russell D. Fernald. 2005. 'Comprehensive Algorithm for Quantitative Real-Time  
842 Polymerase Chain Reaction'. *Journal of Computational Biology: A Journal of Computational  
843 Molecular Cell Biology* 12 (8): 1047–64. <https://doi.org/10.1089/cmb.2005.12.1047>.
- 844 Zhou, Rongbin, Aubry Tardivel, Bernard Thorens, Inpyo Choi, and Jürg Tschopp. 2010.  
845 'Thioredoxin-Interacting Protein Links Oxidative Stress to Inflammasome Activation'.  
846 *Nature Immunology* 11 (2): 136–40. <https://doi.org/10.1038/ni.1831>.
- 847 Zhu, Qifan, and Thirumala-Devi Kanneganti. 2017. 'Cutting Edge: Distinct Regulatory Mechanisms  
848 Control Proinflammatory Cytokines IL-18 and IL-1 $\beta$ '. *The Journal of Immunology* 198 (11):  
849 4210–15. <https://doi.org/10.4049/jimmunol.1700352>.

## 851 **Figure Legends**

### 852 **Figure 1.** Morphofunctional characterisation of NLRP3 in the ovary of cyclic mice

853 (A) Experimental design: oestrous cycle synchronisation with eCG and hCG as previously described  
854 (Hasegawa et al. 2016). Ovaries were collected from animals in oestrus (E) or dioestrus (D) stage of  
855 the cycle. Quantification of mRNA levels of (B) Nod-Like Receptor Protein 3 (*Nlrp3*), caspase-1  
856 (*Casp1*), interleukin-1 $\beta$  (*Il-1 $\beta$* ), interleukin-18 (*Il-18*) by real-time PCR. Abundance of (C) Nod-Like  
857 Receptor Protein 3 (NLRP3), (D) pro IL-18 p24, (E) IL-18 p18, (F) pro CASP1 p45 and (G) CASP1  
858 p20 protein during E and D measured by western blotting analysis. Data was normalized to ribosomal  
859 protein L37 (*Rpl37*) mRNA expression and  $\beta$ -actin of or glyceraldehyde 3-phosphate dehydrogenase  
860 (GAPDH) protein expression. Bars represent mean  $\pm$  SEM. Statistical analysis between groups was  
861 carried out using Mann–Whitney. n=5-7 for real-time PCR analysis and n=6 for immunoblots.  
862 Asterisks indicate significant differences (\*p< 0.05; \*\*p<0.01). Representative immunohistochemical  
863 staining of NLRP3 protein during follicular development in the mouse ovary. Positive staining in  
864 brown, counterstaining with heamatoxylin. (H, J) Negative control incubated with secondary  
865 antibody. Localisation of NLRP3 in (I) whole ovary of 16 weeks (wk) mice fed chow diet (CD), (K)  
866 primary follicles of 16 wk CD mice, (L) secondary follicles of 16 wk high fat diet (HFD) mice, and  
867 (M) preantral follicles of 16 wk CD mice. Staining was detected in granulosa and theca cells. Faint  
868 staining was observed in the oocytes of all stages of folliculogenesis. Arrows denote granulosa cells,  
869 arrow-heads denote theca cells, asterisks denote oocytes. The immunohistochemistry staining was  
870 confirmed by immunofluorescent localisation of NLRP3. Positive staining in orange, nuclear  
871 counterstaining with DAPI in blue. (N) Negative control 16 wk CD stained with polyclonal rabbit  
872 IgG. NLRP3 localised in (O) whole ovary, (P-Q) secondary follicles of 16 wk CD mice, (R-S)  
873 preantral follicles of 16 wk HFD mice, (T-U) antral follicles of 16 wk HFD mice. Inserts in top left  
874 corners represent magnifications of granulosa cells. Scale bars represent 20 or 100  $\mu$ m.

875

### 876 **Figure 2.** Diet induced-obesity changes NLRP3 expression in the ovary

877 (A) Experimental design: mice were fed either chow diet (CD) or high fat diet (HFD) for 4 weeks  
878 (wk) or 16 wk and ovaries were collected during dioestrus stage. Quantification of (B) Nod-Like  
879 Receptor Protein 3 (*Nlrp3*), caspase-1 (*Casp1*), interleukin-1 $\beta$  (*Il-1 $\beta$* ), and interleukin-18 (*Il-18*)  
880 mRNA by real-time PCR. Abundance of (C) NLRP3, (D) pro CASP1 p45, (E) CASP1 p20, (F) pro

881 IL-18 p24, (G) IL-18 p18 protein measured by western blotting and (H) IL-1 $\beta$  protein measured by  
882 ELISA in ovarian extracts collected from DIO mice. mRNA level was normalized with ribosomal  
883 protein L37 (*Rpl37*) value and protein expression with  $\beta$ -actin or glyceraldehyde 3-phosphate  
884 dehydrogenase (GAPDH) level. Bars represent mean  $\pm$  SEM. Differences between control and  
885 treatment groups analysed with Mann–Whitney; n=6-9 for real-time PCR analysis, n=8 for  
886 immunoblots and n=6 for ELISA. Asterisks indicate significant differences (\*p< 0.05; \*\*p<0.01;  
887 +p=0.06; +p=0.07 or +p=0.082 – all values indicated).

888

889 **Figure 3.** Leptin signalling in the ovary drive changes of NLRP3 during obesity

890 A) Experimental design: i) pharmacological hyperleptinemia model, mice were either injected with  
891 saline or 100 $\mu$ g of leptin (L) for 16 days ; and ii) genetic obesity model, mice lacking leptin in  
892 circulation (*ob/ob* -/-) or control group (*ob/ob* +/-). B) Heatmap illustrating fold of change in  
893 expression of mRNA of genes Nod-Like Receptor Protein 3 (*Nlrp3*), caspase-1 (*Casp1*), interleukin-  
894 1 $\beta$  (*Il-1 $\beta$* ), interleukin-18 (*Il-18*), apoptosis-associated speck-like protein containing A CARD (*Asc*),  
895 interleukin-10 (*Il-10*) and tumour necrosis factor alpha (*Tnf*) in hyperleptinemia and *ob/ob* models  
896 determined by real-time PCR. The scale matches colours to log 2 fold change (log2\_FC) values.  
897 Abundance of (C) NLRP3, (D) pro CASP1 p45, (E) CASP1 p20 measured by western blotting and  
898 (F) IL-1 $\beta$  quantified by EIA, in the mouse ovarian extracts. Level mRNA normalized with ribosomal  
899 protein L37 (*Rpl37*) value and protein expression with  $\beta$ -actin or glyceraldehyde 3-phosphate  
900 dehydrogenase (GAPDH) . Bars represent mean  $\pm$  SEM. Statistical analysis between groups was  
901 carried out using Mann–Whitney test. n=6-9 for real-time PCR analysis and n=4-8 for immunoblots.  
902 Asterisks indicate significant differences (\*p< 0.05; + p=0.07).

903

904 **Figure 4.** Cumulus cells transcriptome analysis from diet- induced obese and pharmacologically  
905 hyperleptinemic mice reveals leptin-mediated regulation of NLRP3 inflammasome genes

906 A) Experimental design: RNA-Seq analysis of differentially expressed genes in cumulus cells  
907 collected from mice: i) with diet- induced obesity (DIO) fed chow diet (CD) or high fat diet (HFD)  
908 for 4 weeks (wk) or 16 wk ii) with pharmacologically hyperleptinemic (LEPT) injected with saline  
909 (C) or 100 $\mu$ g of leptin (L) for 16 days. B) Heatmap illustrating expression of genes from leptin

910 signalling pathway and NLRP3 inflammasome in LEPT and 4 wk HFD normalized by control group  
911 fed CD or injected with saline, respectively. Downregulated genes in blue, upregulated genes in  
912 orange. The scale on the right matches colours to log<sub>2</sub> fold change (log<sub>2</sub> FC) values. (C) Heatmap  
913 showing significant changes in major constitutive genes in both conditions leptin and 4 wk HFD. (D)  
914 Five main clusters in the network representing strong interaction between selected genes described in  
915 B and genes presented in C. (E) Pie chart that displays the main three gene ontology terms that were  
916 significantly enriched in cumulus cells in both conditions LEPT and 4 wk HFD. Gene ontology  
917 analysis performed with Gene Ontology Enrichment Analysis and Visualisation Tool. (F) Heatmaps  
918 showing conserved genes involved in NLRP3 inflammasome activation, glutathione metabolism and  
919 other regulations. log<sub>2</sub> FC of reads per million (RPM).

920

921 **Figure 5.** NLRP3 activity in the liver of diet- induced obese, hyperleptinemic and genetically obese  
922 mice

923 (A) Experimental design: i) diet induced obese (DIO) mice were fed chow diet (CD) or high fat diet  
924 (HFD) for 4 weeks (wk) or 16 wk; ii) pharmacologically hyperleptinemic mice were treated with  
925 saline (C) or 100µg of leptin (L) for 16 days; iii) genetically obese mice lacking leptin (*ob/ob* <sup>-/-</sup>) and  
926 control group (*ob/ob* <sup>+/?</sup>). (B) Heatmap illustrating fold change in expression of mRNA of genes  
927 Nod-Like Receptor Protein 3 (*Nlrp3*), caspase-1 (*Casp1*), interleukin-1β (*Il-1β*), and interleukin-18  
928 (*Il-18*), apoptosis-associated speck-like protein containing a CARD (*Asc*), interleukin-10 (*Il-10*) and  
929 tumour necrosis factor alpha (*Tnf*) in DIO, hyperleptinemia and *ob/ob* models in comparison to  
930 respective controls, determined by real-time PCR. The scale on the right matches colours to log<sub>2</sub> fold  
931 change (log<sub>2</sub> FC) values. Data normalised to mRNA expression of ribosomal protein L37 (*Rpl37*).  
932 Abundance of (C) NLRP3, (D) pro CASP1 p45, (E) CASP1 p20, (F) pro IL-18 p24 in mouse liver of  
933 DIO, hyperleptinemic and *ob/ob* mice measured in western blotting analysis. Protein normalised with  
934 β-actin or glyceraldehyde 3-phosphate dehydrogenase (GAPDH) level. Bars represent mean ± SEM.  
935 Statistical analysis between groups was carried out using Mann–Whitney test; n=6-9 for real-time  
936 PCR analysis and n=5-8 for immunoblots. Asterisks indicate significant differences (\*p< 0.05;  
937 \*\*p<0.01).

938

939 **Table 1.** Specification of antibodies used for Western blotting.



940

| <b>Antibody name and specificity</b>                                       | <b>Company, Cat no, RRID no</b>                       | <b>Antibody dilution</b> |
|----------------------------------------------------------------------------|-------------------------------------------------------|--------------------------|
| Mouse monoclonal against NLR family pyrin domain containing 3 (NLRP3)      | AdipoGen Cat# AG-20B-0014, RRID:AB_2490202            | 1:1000                   |
| Rabbit monoclonal against Caspase 1 (CASP1)                                | Abcam Cat# ab108362, RRID:AB_10858984                 | 1:1000                   |
| Rabbit polyclonal against interleukin-18 (IL-18)                           | Abcam Cat# ab71495, RRID:AB_1209302                   | 1:250                    |
| Mouse monoclonal against $\beta$ -actin                                    | Sigma-Aldrich Cat# A2228, RRID:AB_476697              | 1:10 000                 |
| Rabbit polyclonal against glyceraldehyde 3-phosphate dehydrogenase (GAPDH) | Abcam Cat# ab9485, RRID:AB_307275                     | 1:2500                   |
| Goat anti-Mouse IgG (H+L) Secondary Antibody, HRP                          | Thermo Fisher Scientific Cat# 31430, RRID:AB_228307   | 1:1000                   |
| Goat anti-Rabbit IgG (H+L) Secondary Antibody, HRP                         | Thermo Fisher Scientific Cat# 31460, RRID:AB_228341   | 1:20 000                 |
| Goat anti-Mouse IgG (H+L) Secondary Antibody, AP                           | Thermo Fisher Scientific Cat# 31321, RRID:AB_10959407 | 1:1000                   |
| Goat Anti-Rabbit IgG (whole molecule) Secondary Antibody, AP               | Sigma-Aldrich Cat# A3687, RRID:AB_258103              | 1:10 000                 |

941

942

943

944

945

946

947

948

949

950

951

952

953

| <b>Gene name</b> | <b>Gene symbol</b> | <b>GenBank Accession no.</b> | <b>Sequences 5'-3'</b> | <b>Length (base pairs)</b> |
|------------------|--------------------|------------------------------|------------------------|----------------------------|
|------------------|--------------------|------------------------------|------------------------|----------------------------|

954

955

956

957

958

959

960

961

962 **Table 2.** Specific primers used for quantitative real-time PCR.

963

964

965

|                                                           |                               |                |                                                        |     |
|-----------------------------------------------------------|-------------------------------|----------------|--------------------------------------------------------|-----|
| NLR family pyrin domain containing 3                      | <i>Nlrp3</i>                  | NM_145827.4    | F: TGGATGGGTTTGCTGGGATA<br>R: TGCTTGGATGCTCCTTGACC     | 190 |
| Caspase 1                                                 | <i>Casp1</i>                  | NM_009807.2    | F: CATGCCGTGGAGAGAAACAA<br>R: GGTGTTGAAGAGCAGAAAGCAA   | 151 |
| Interleukin-1 $\beta$                                     | <i>IL-1<math>\beta</math></i> | NM_008361.4    | F: TTGACGGACCCCAAAGATG<br>R: GCTTCTCCACAGCCACAATGA     | 144 |
| Interleukin-18                                            | <i>Il-18</i>                  | NM_008360.2    | F: GAAGAAAATGGAGACCTGGAATCA<br>R: TCTGGGGTTCCTGGCACTT  | 157 |
| Apoptosis-Associated Speck-Like Protein Containing A CARD | <i>Asc</i>                    | NM_023258.4    | F: GCTTAGAGACATGGGCTTACAGGA<br>R: CCAGCACTCCGTCCACTTCT | 179 |
| Interleukin-10                                            | <i>Il-10</i>                  | NM_010548.2    | F: CCTGGGTGAGAAGCTGAAGAC<br>R: CTGCTCCACTGCCTTGCTCT    | 91  |
| Tumor necrosis factor                                     | <i>Tnf</i>                    | NM_001278601.1 | F: GCCACCACGCTCTTCTGTCT<br>R: TGAGGGTCTGGGCCATAGAA     | 106 |
| Ribosomal protein L37                                     | <i>Rpl37</i>                  | NM_026069.3    | F:CTGGTCGGATGAGGCACCTA<br>R: AAGAACTGGATGCTGCGACA      | 108 |

966

967 **Table 3.** Body weight measurement of 3 mouse models

968 Diet induced obese (DIO) mice were fed chow diet (CD) or high fat diet (HFD); ii)  
969 pharmacologically hyperleptinemic mice were treated with saline (C) or leptin (L) for 16 days; iii)  
970 genetically obese mice lacking leptin (*ob/ob*  $-/-$ ) and control group (*ob/ob*  $+/?$ ). Statistical analysis  
971 between groups was carried out using T-test. Asterisks indicate significant differences (\*\* $p < 0.01$ ;  
972 \*\*\* $p < 0.001$ ; \*\*\*\* $p < 0.0001$ ).

973

974

|                  | <b>0 wk</b>     | <b>4 wk</b>     | <b>8 wk</b>     | <b>12 wk</b>    | <b>16 wk</b>    |
|------------------|-----------------|-----------------|-----------------|-----------------|-----------------|
| <b>CD</b>        | 17.0 (±0.6)     | 19.7 (±1.0)     | 20.0 (±0.9)     | 20.9 (±1.0)     | 22.6 (±2.5)     |
| <b>HFD</b>       | 19.4 (±0.8)     | 24.8 (±2.5)**** | 29.1 (±3.6)**** | 33.1 (±4.3)**** | 37.6 (±3.7)**** |
|                  | <b>0 d</b>      | <b>3 d</b>      | <b>9 d</b>      | <b>12 d</b>     | <b>16 d</b>     |
| <b>C</b>         | 21.7 (±1.7)     | 22.8 (±2.0)     | 22.1 (±2.1)     | 21.5 (±1.6)     | 21.9 (±1.9)     |
| <b>L</b>         | 21.8 (±1.9)     | 20.5 (±1.9)     | 19.0 (±1.4)**   | 18.5 (±1.2)***  | 19.4 (±1.7)     |
|                  | <b>8 wk</b>     | <b>9 wk</b>     | <b>10 wk</b>    | <b>11 wk</b>    | <b>12 wk</b>    |
| <b>ob/ob +/?</b> | 20.9 (±1.6)     | 21.5 (±1.6)     | 22.2 (±1.6)     | 22.8 (±2.1)     | 22.7 (±2.1)     |
| <b>ob/ob -/-</b> | 39.8 (±5.4)**** | 43.1 (±5.0)**** | 45.0 (±4.7)**** | 47.4 (±5.7)**** | 48.8 (±4.0)**** |

975



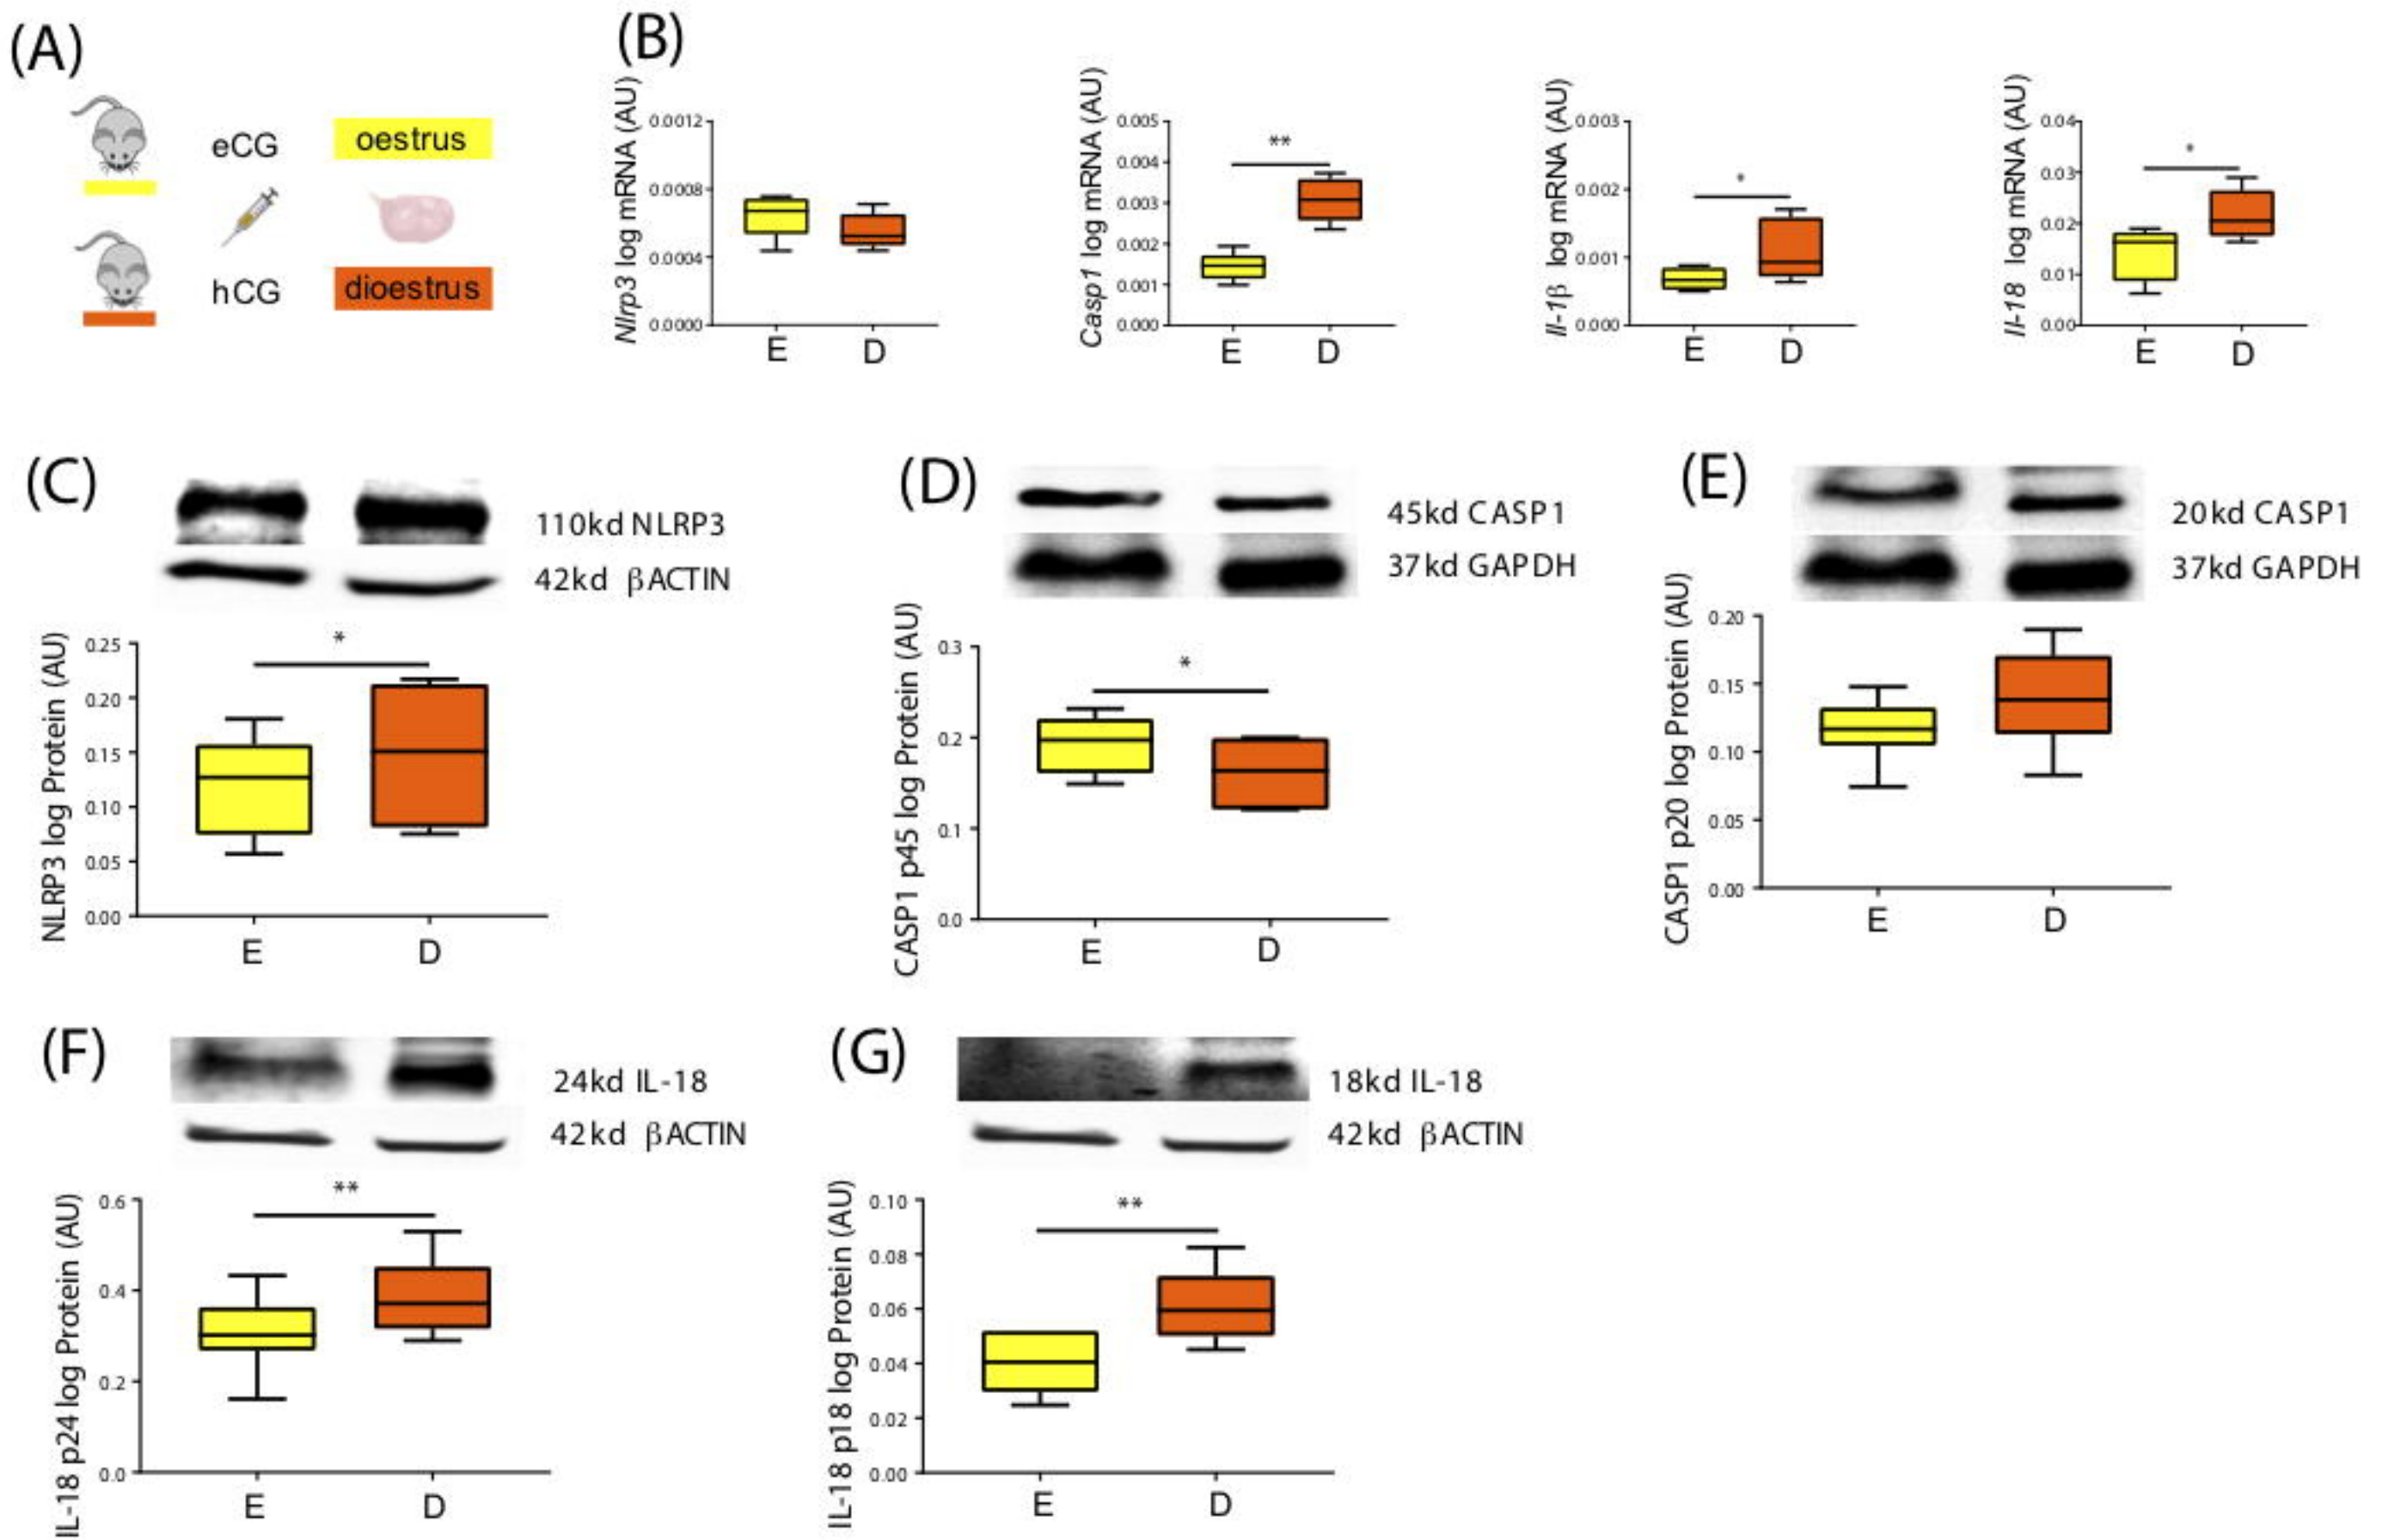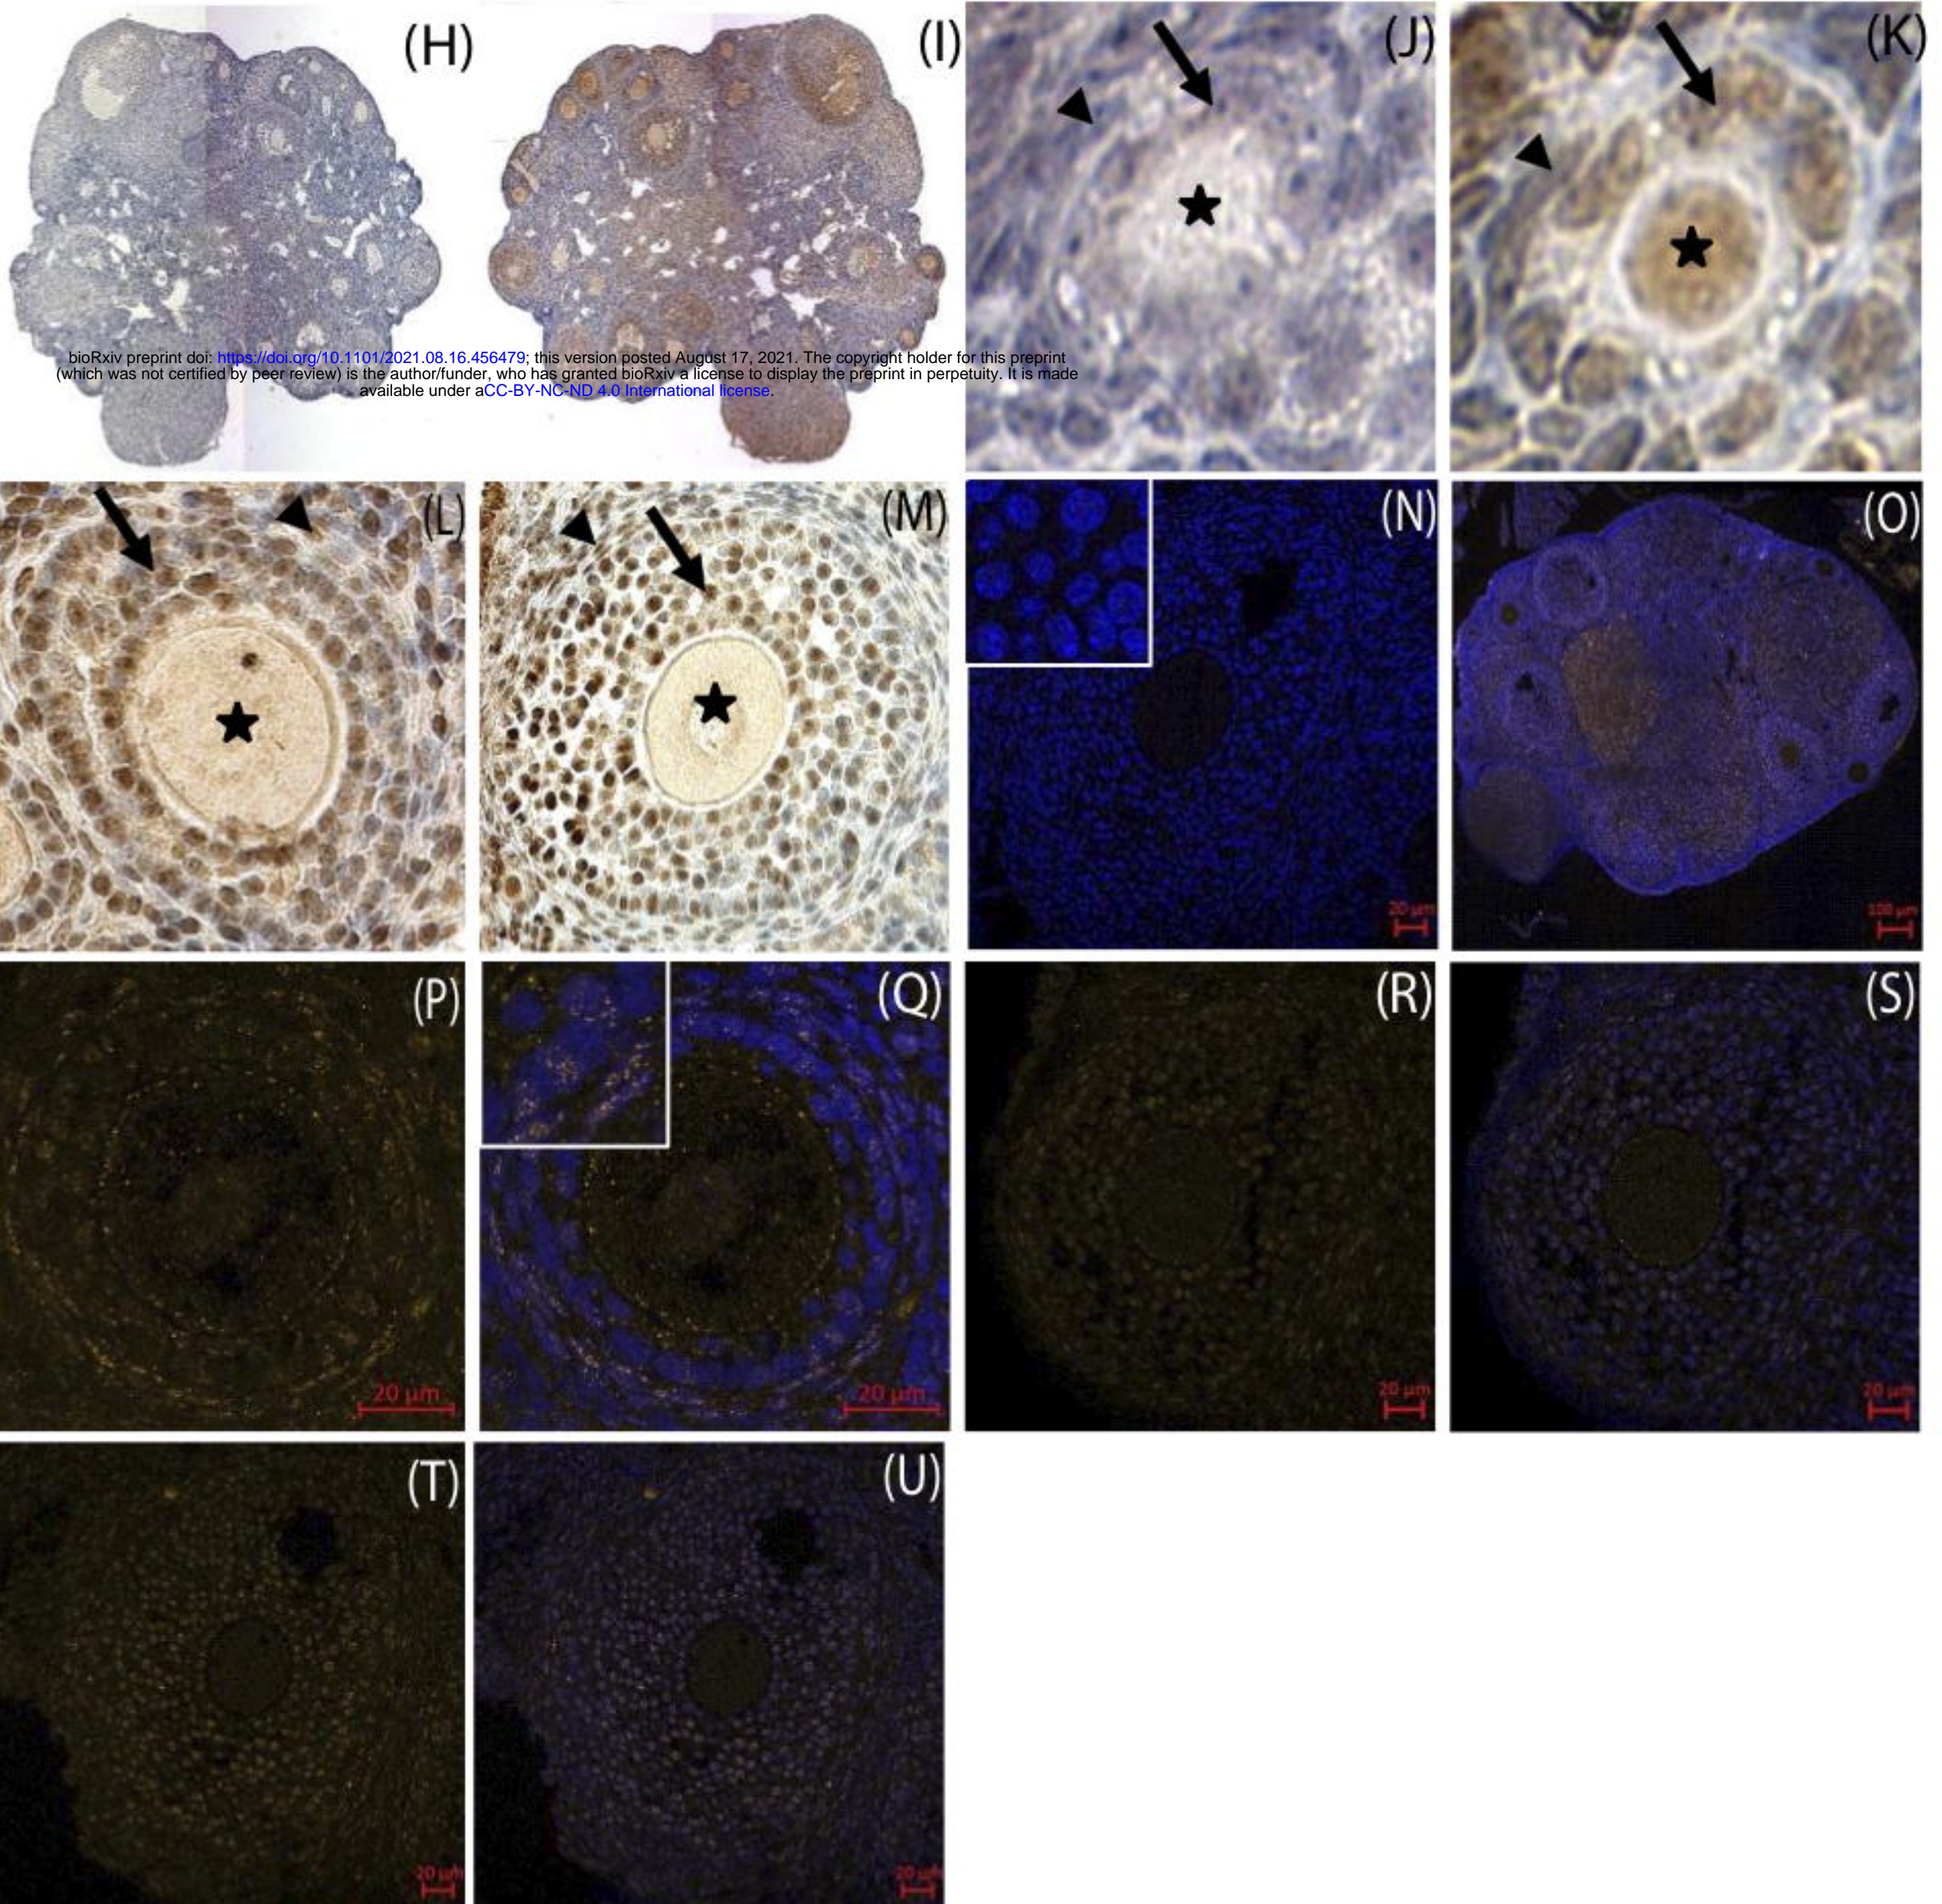



**(A)**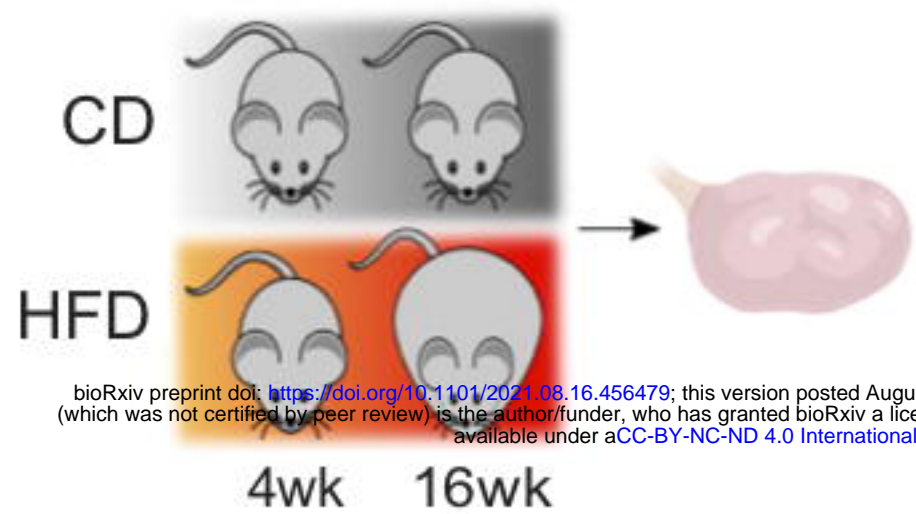

bioRxiv preprint doi: <https://doi.org/10.1101/2021.08.16.456479>; this version posted August 17, 2021. The copyright holder for this preprint (which was not certified by peer review) is the author/funder, who has granted bioRxiv a license to display the preprint in perpetuity. It is made available under aCC-BY-NC-ND 4.0 International license.

**(B)**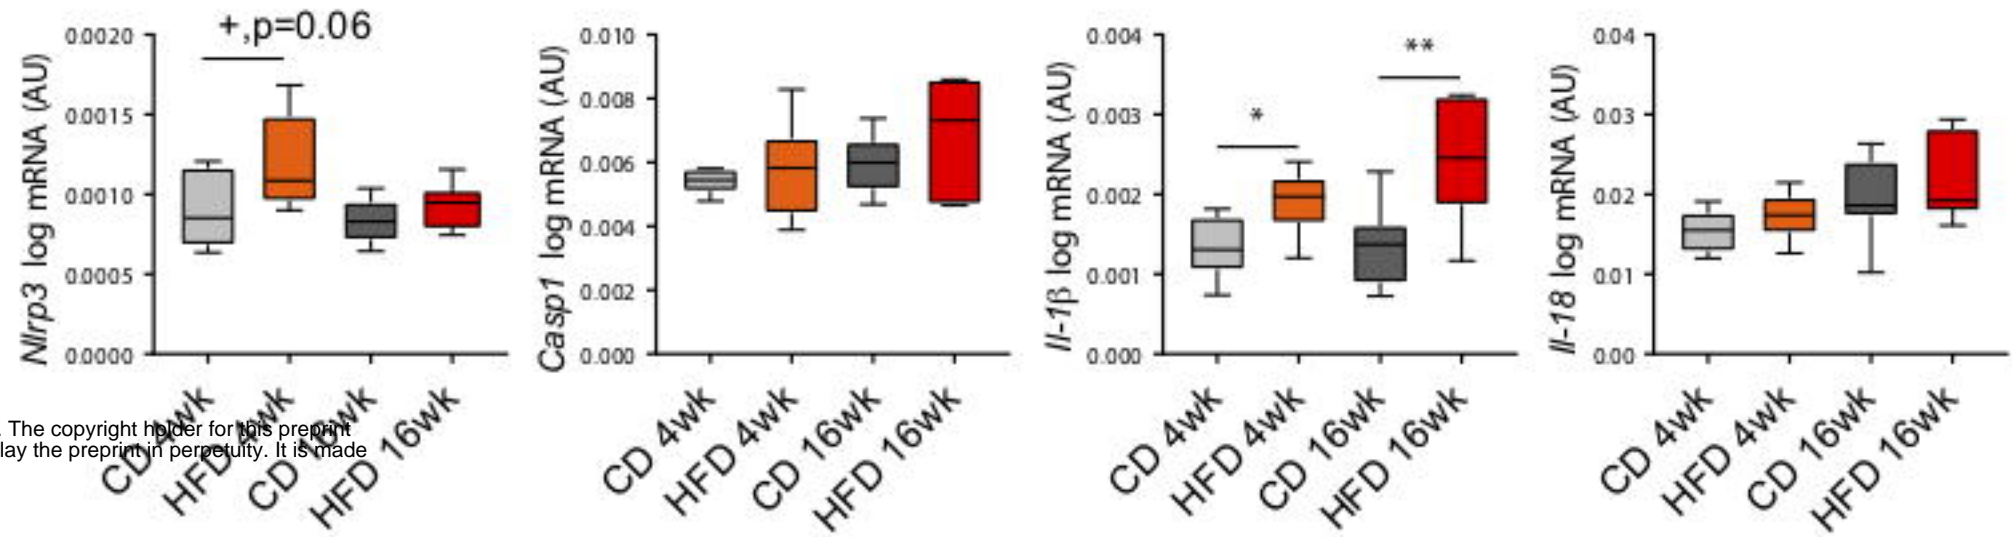**(C)**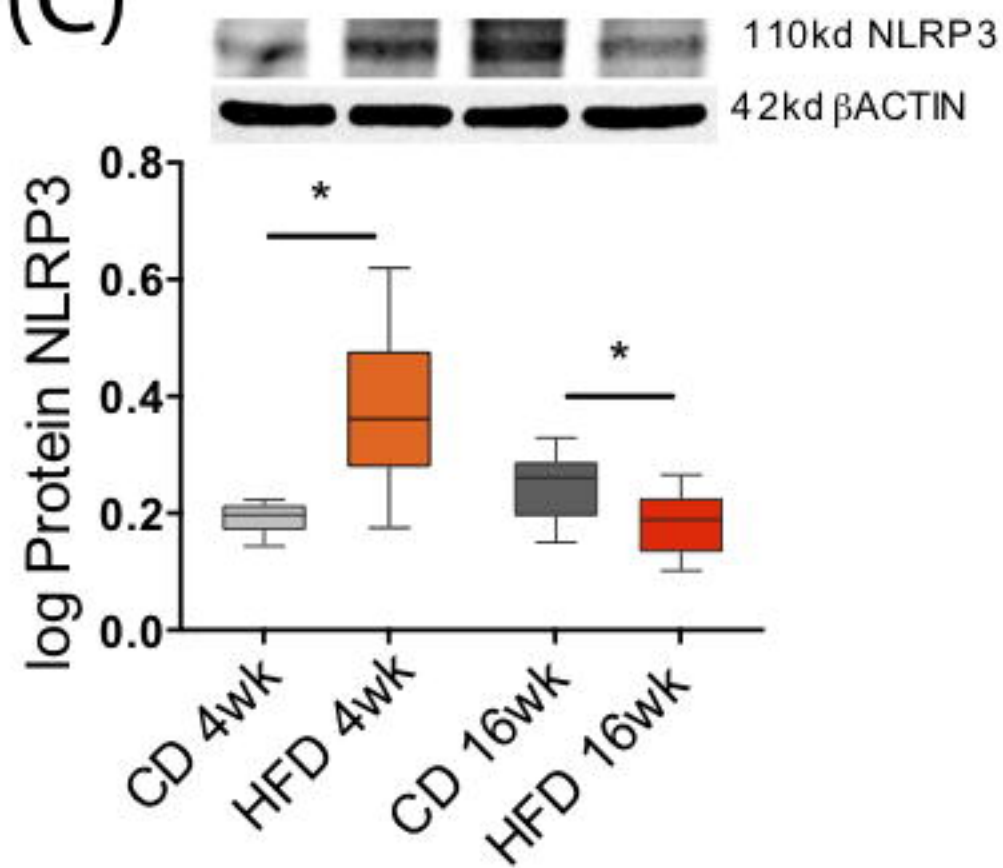**(D)**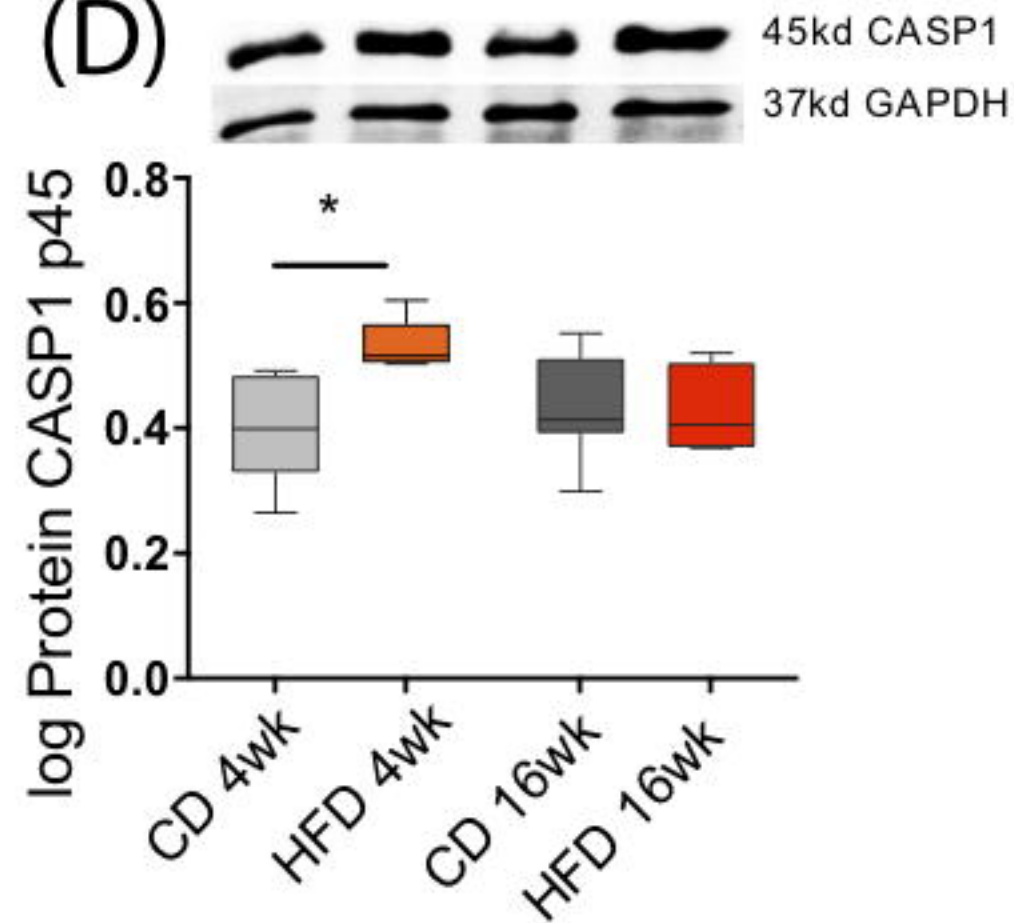**(E)**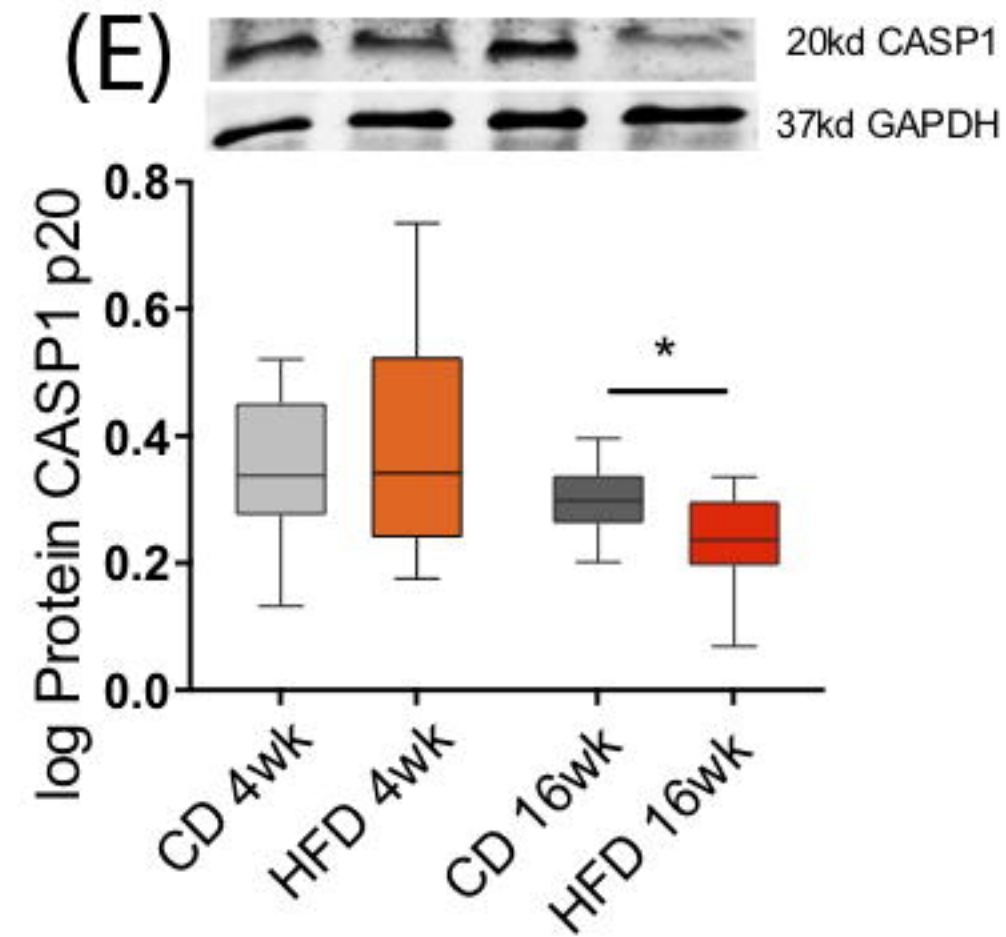**(F)**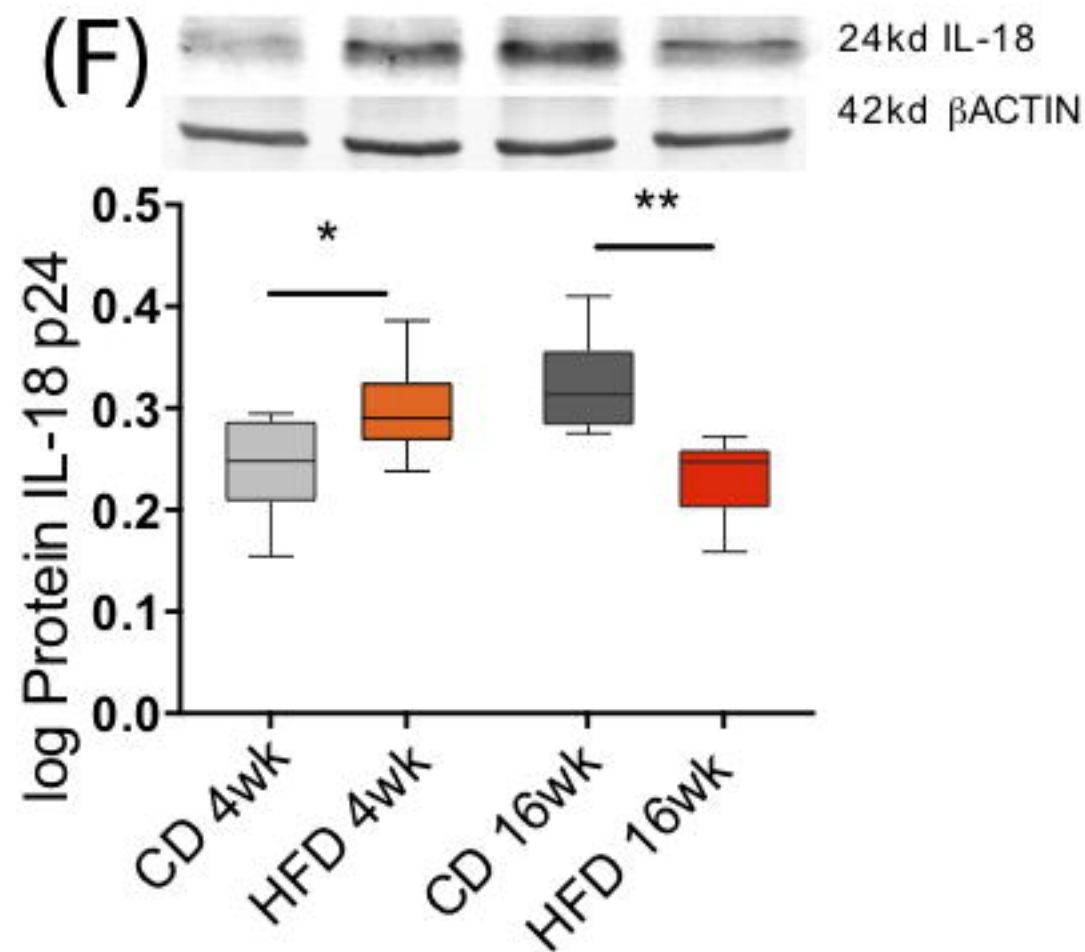**(G)**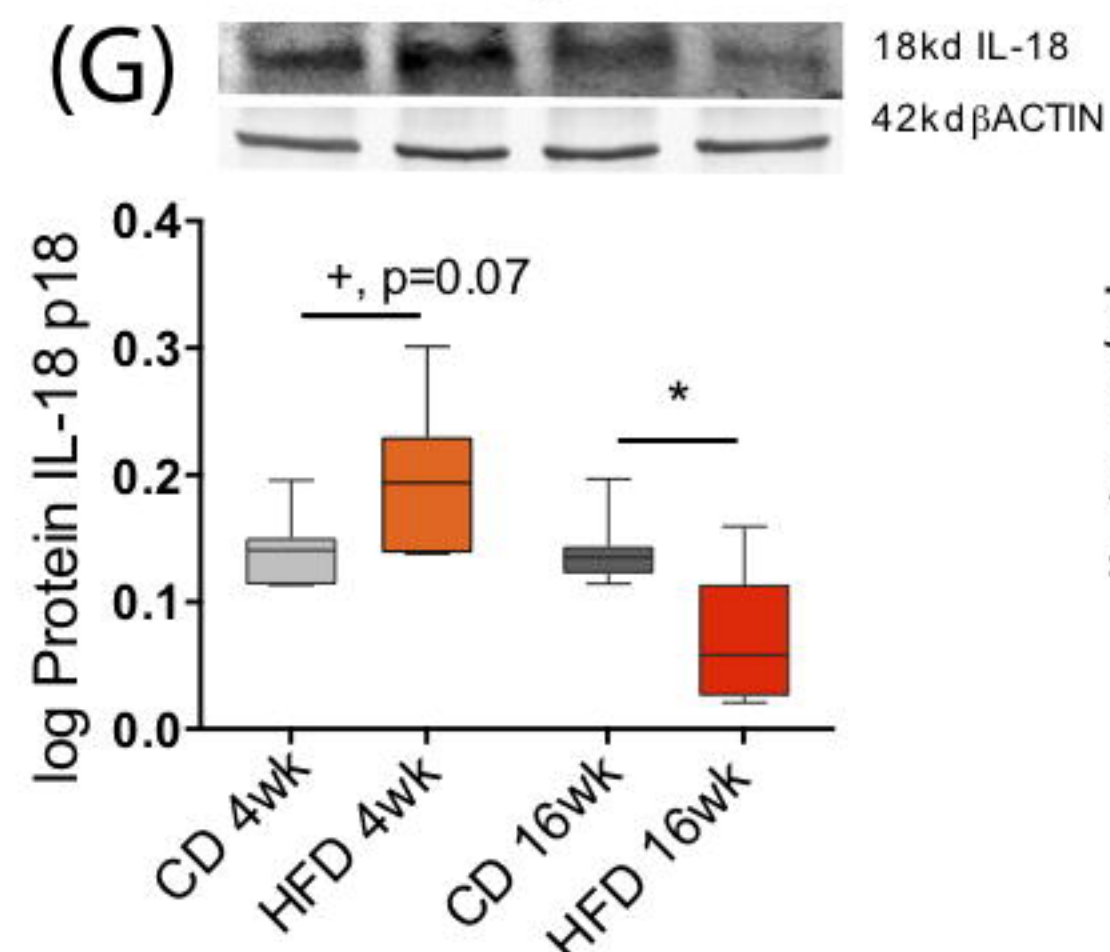**(H)**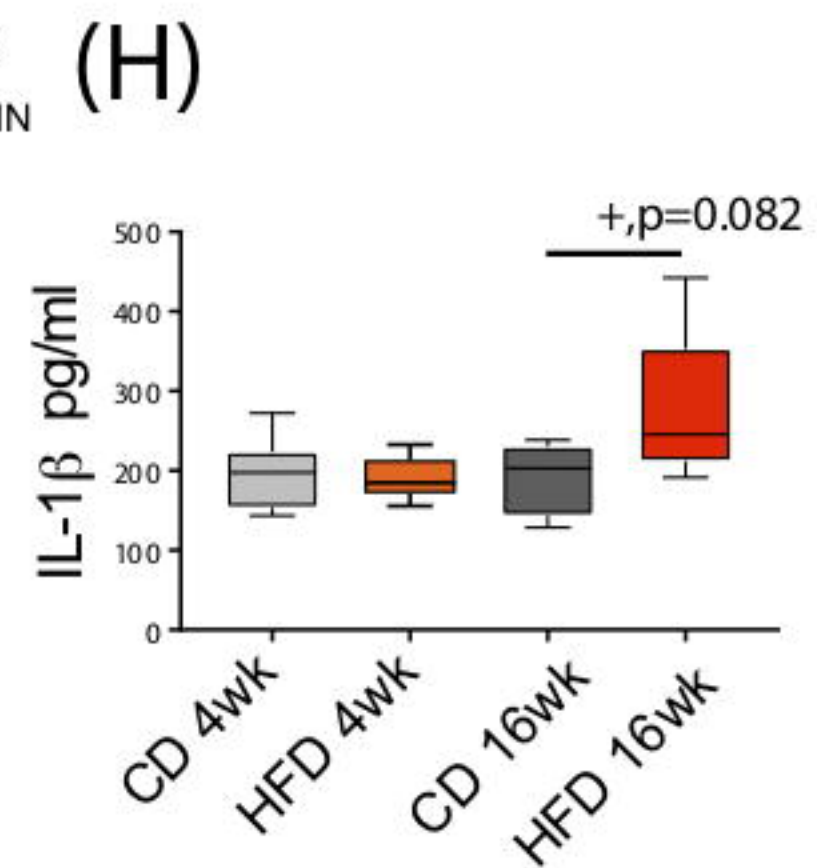

**(A)**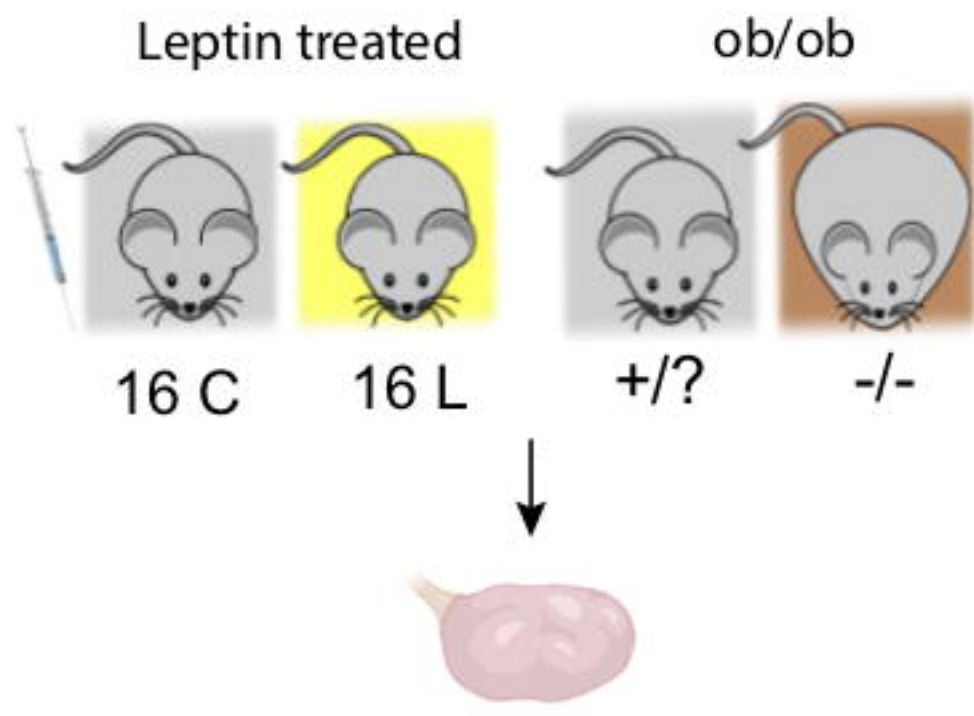**(B)**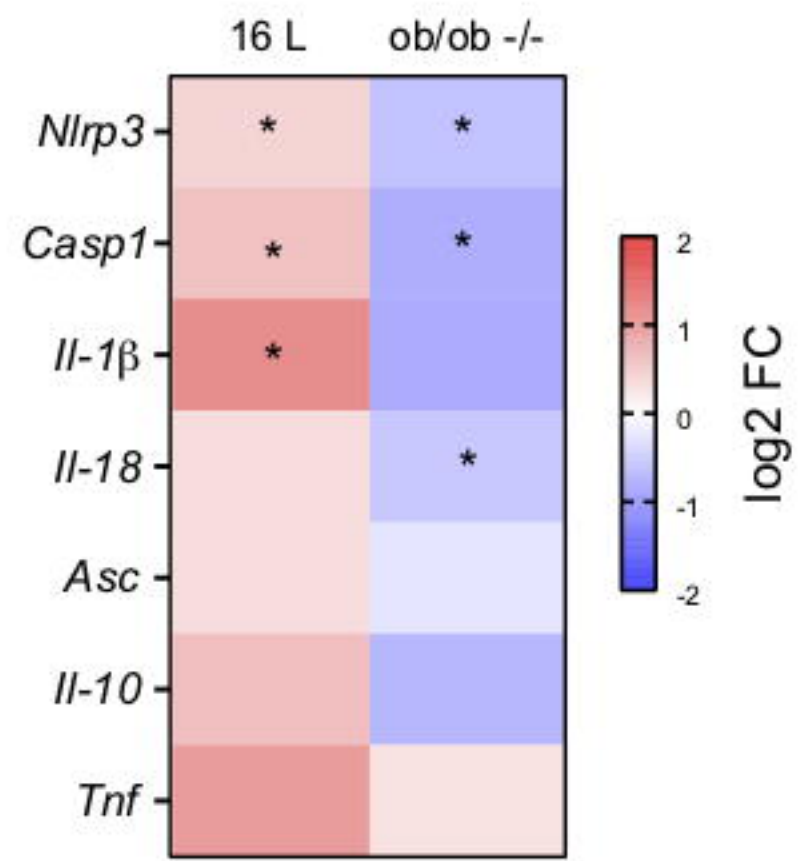**(C)**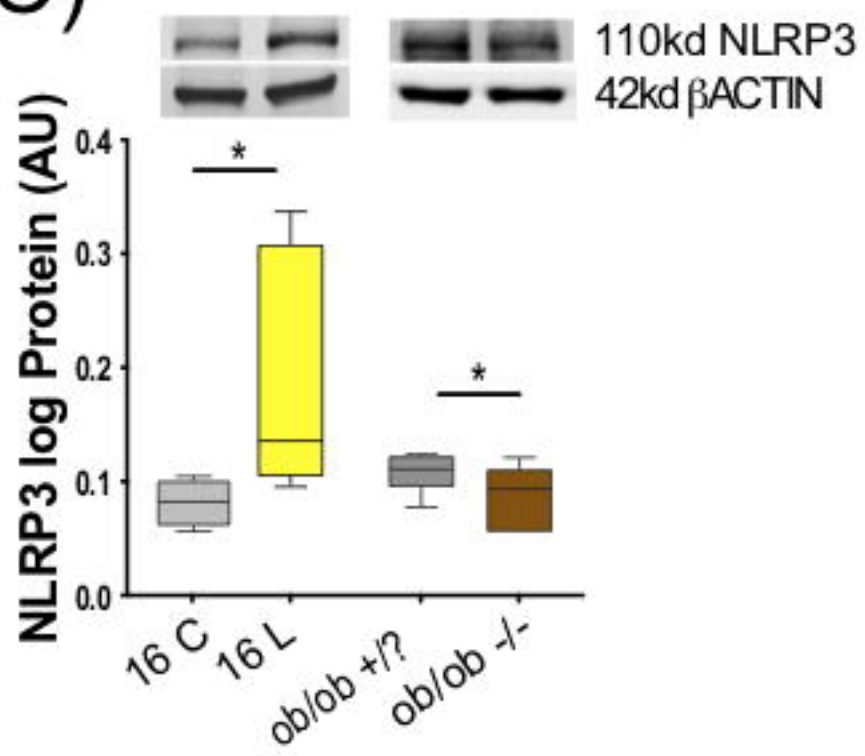**(D)**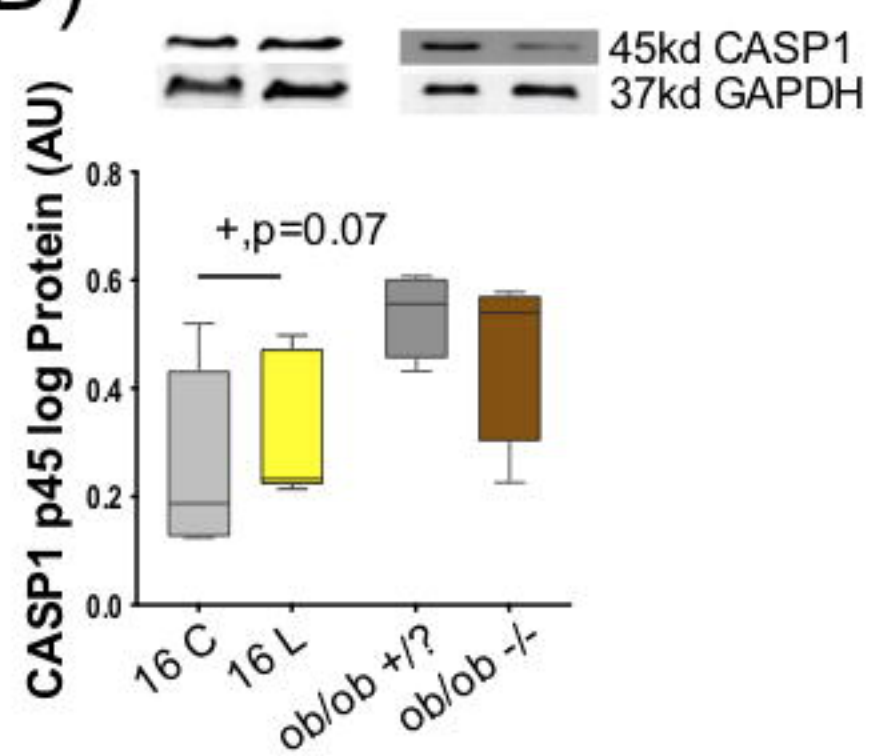**(E)**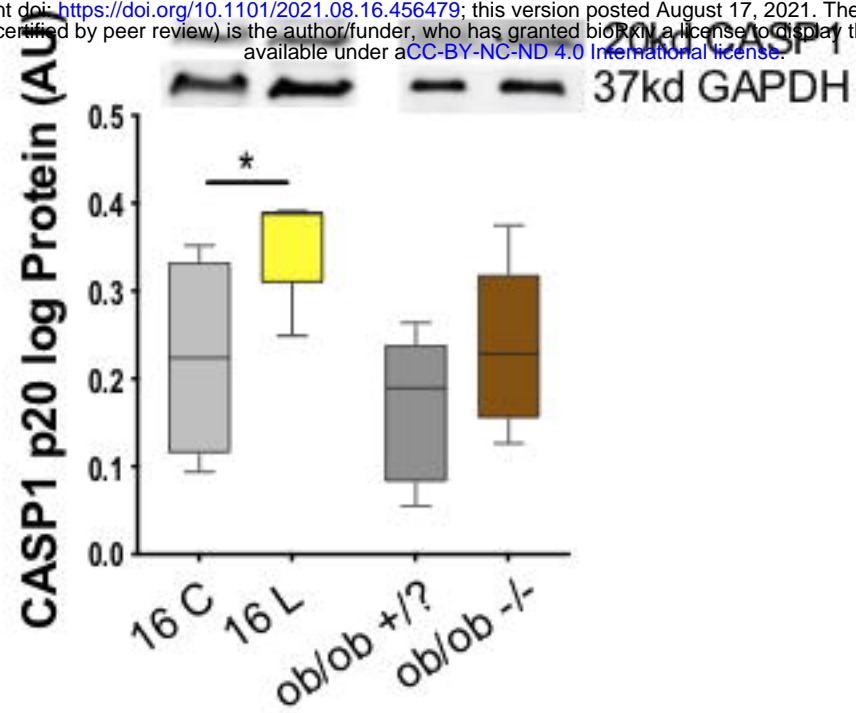**(F)**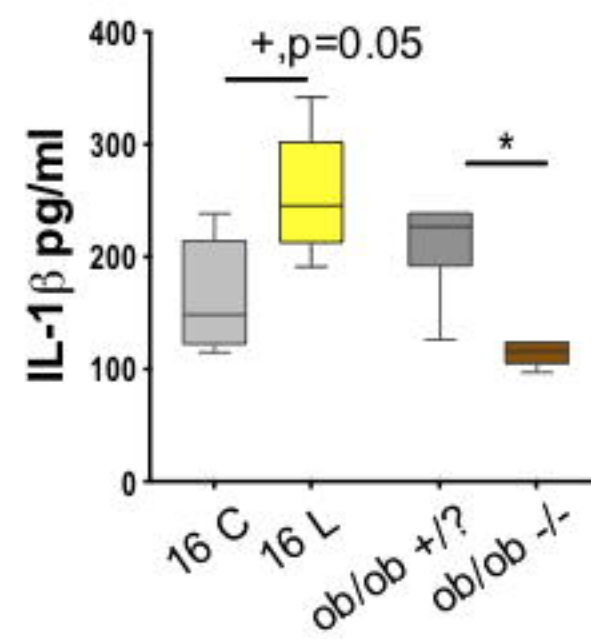



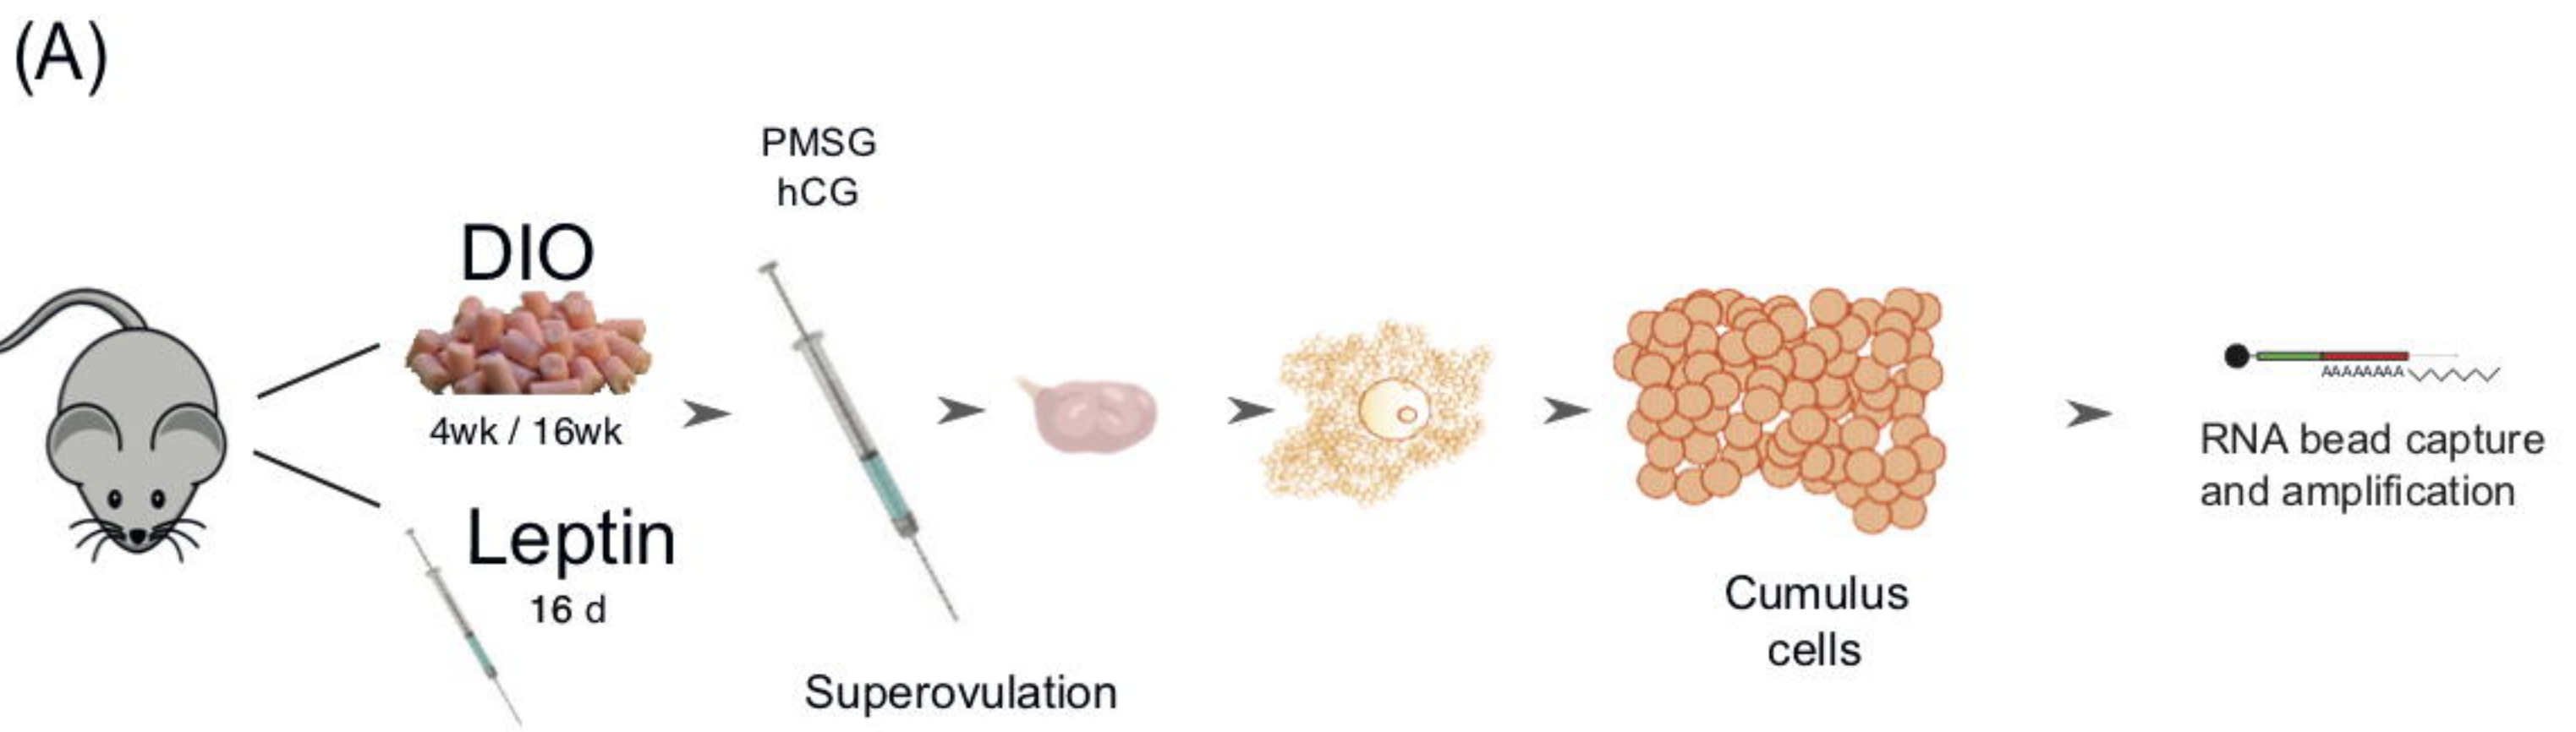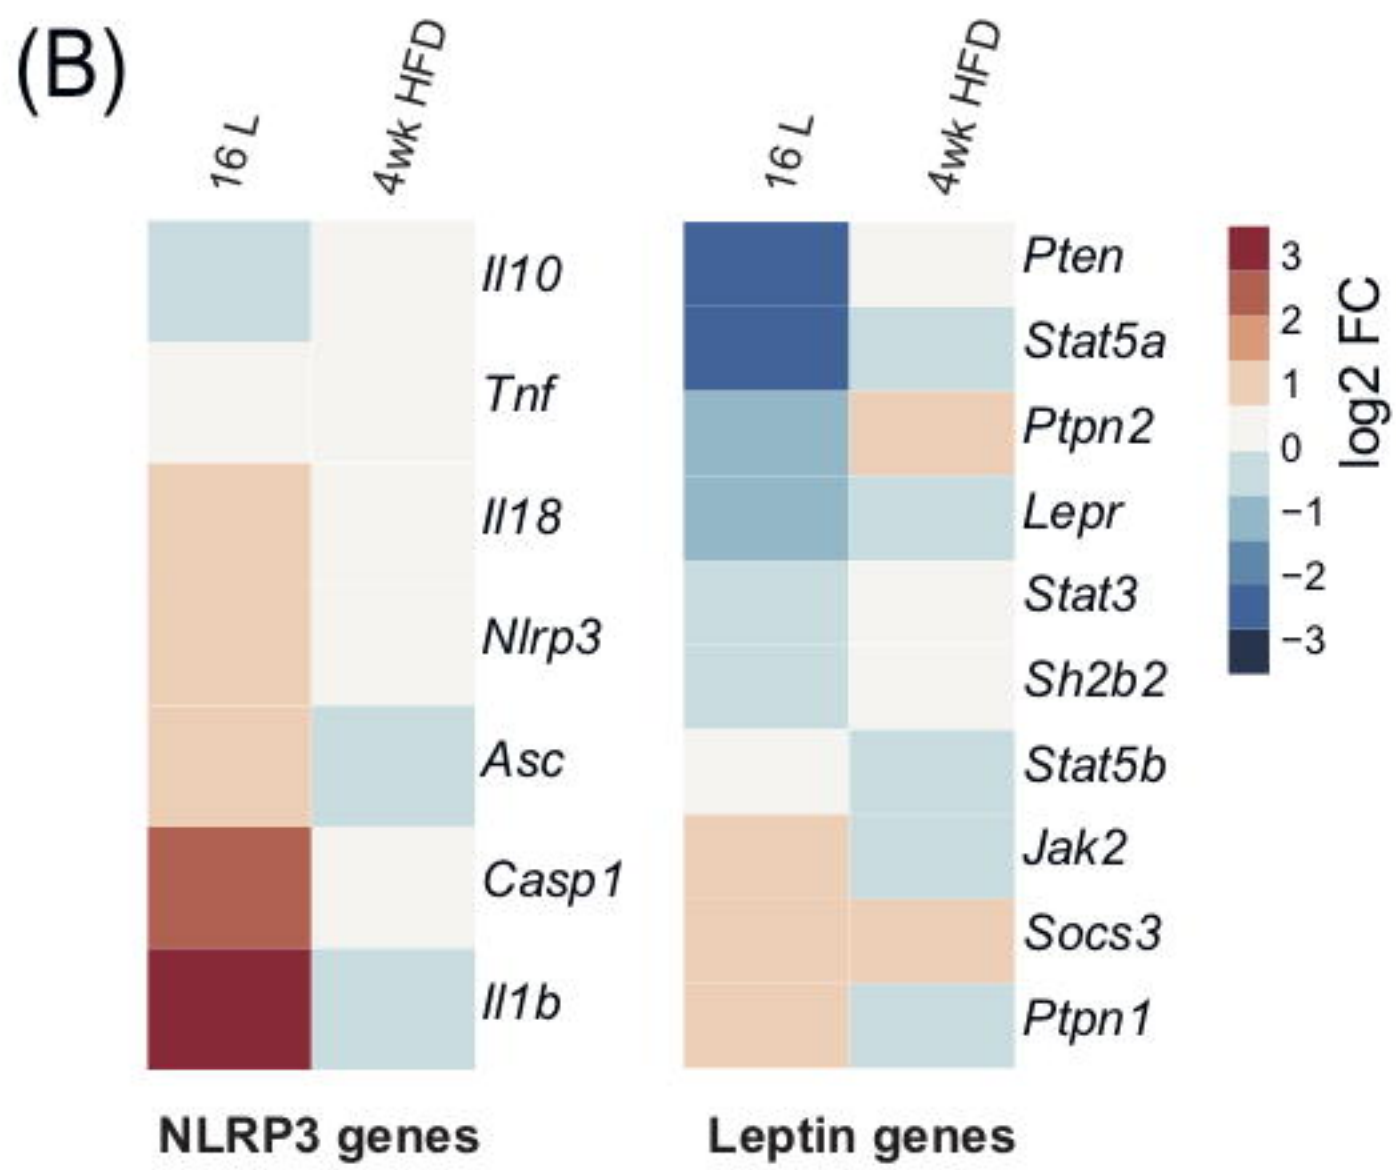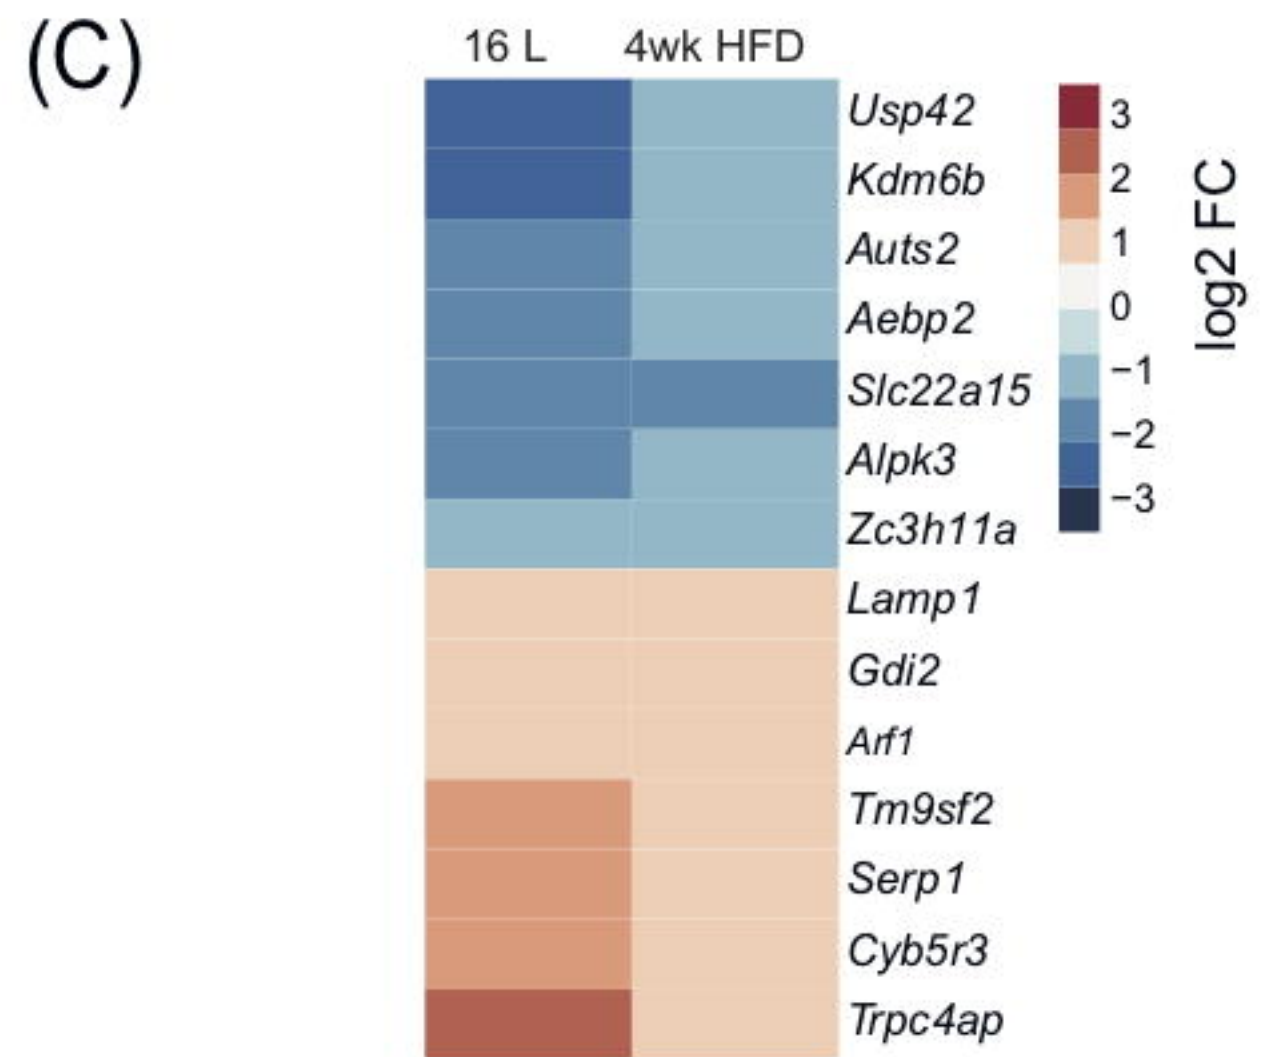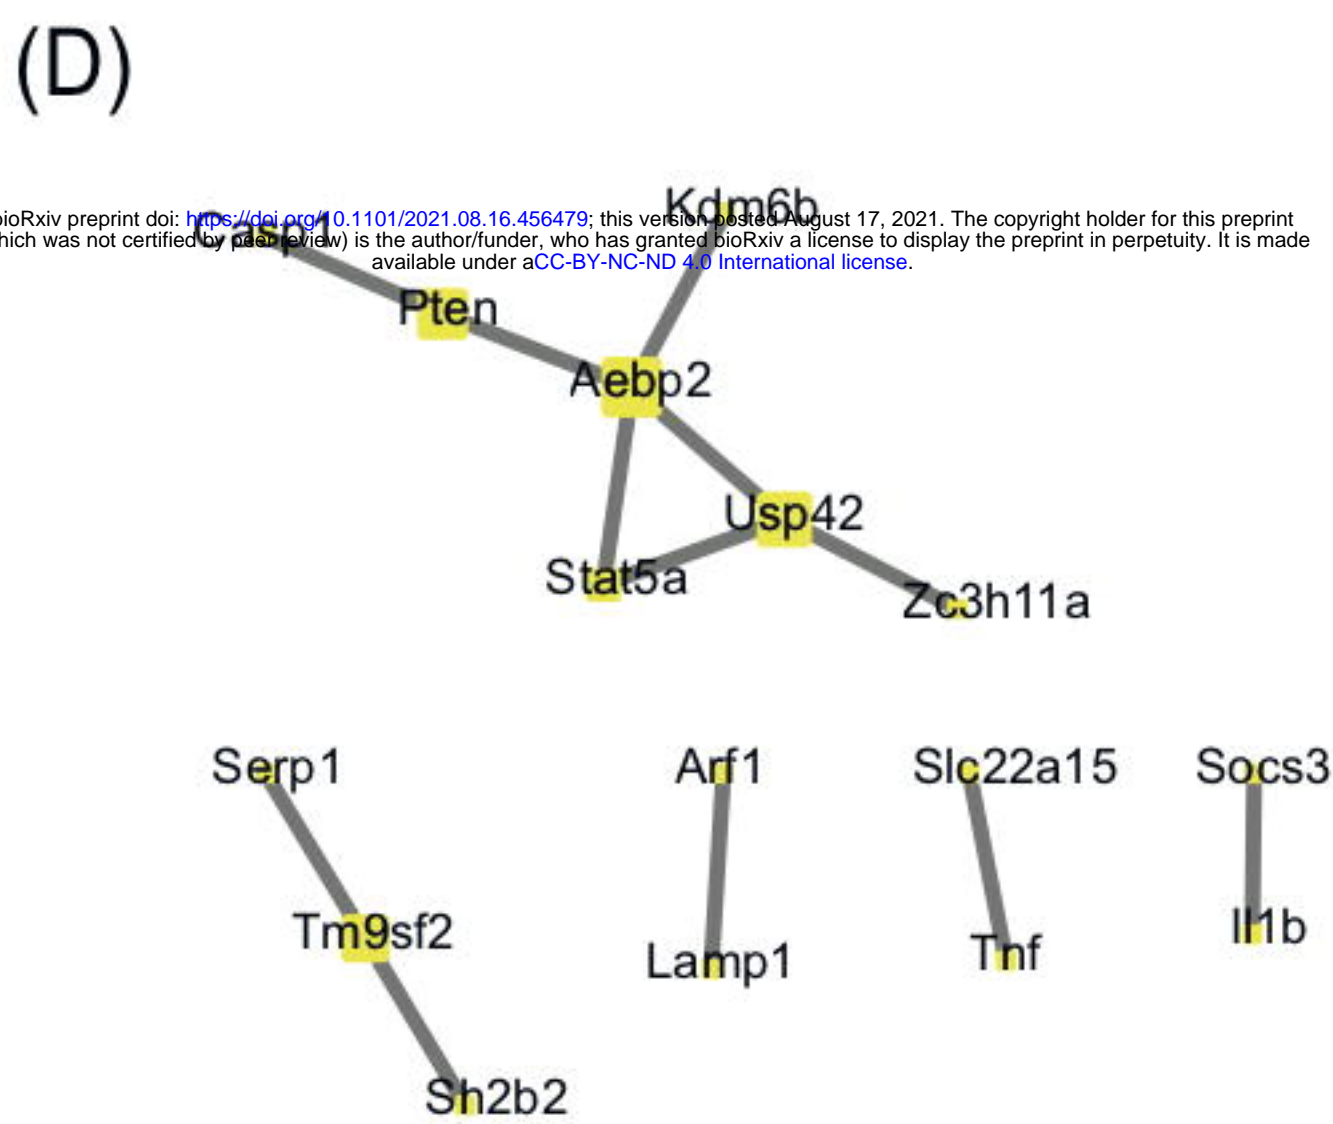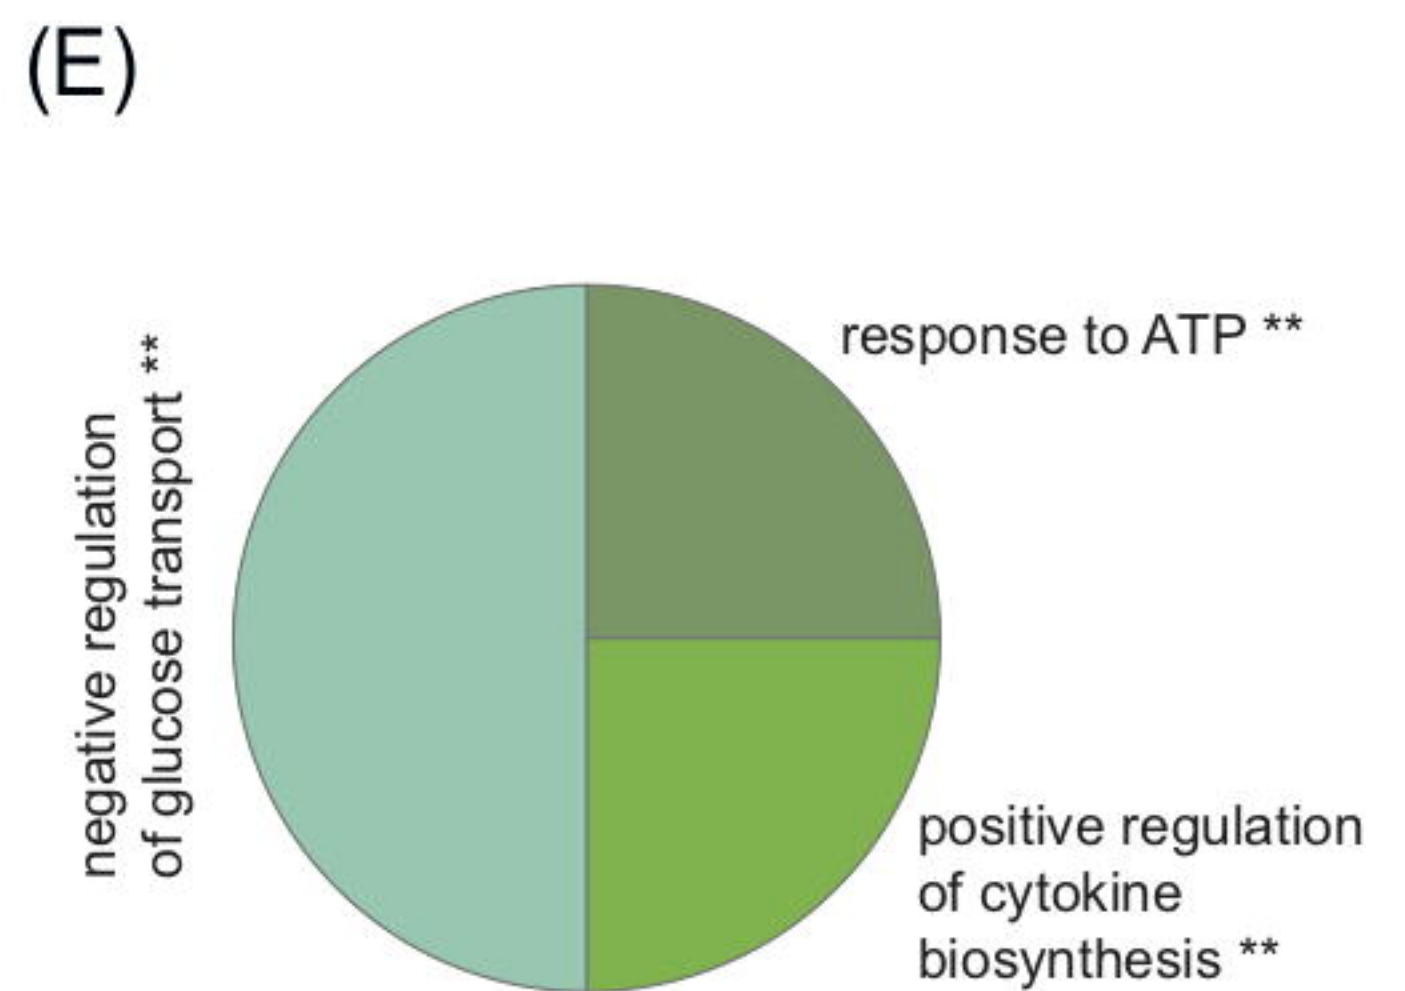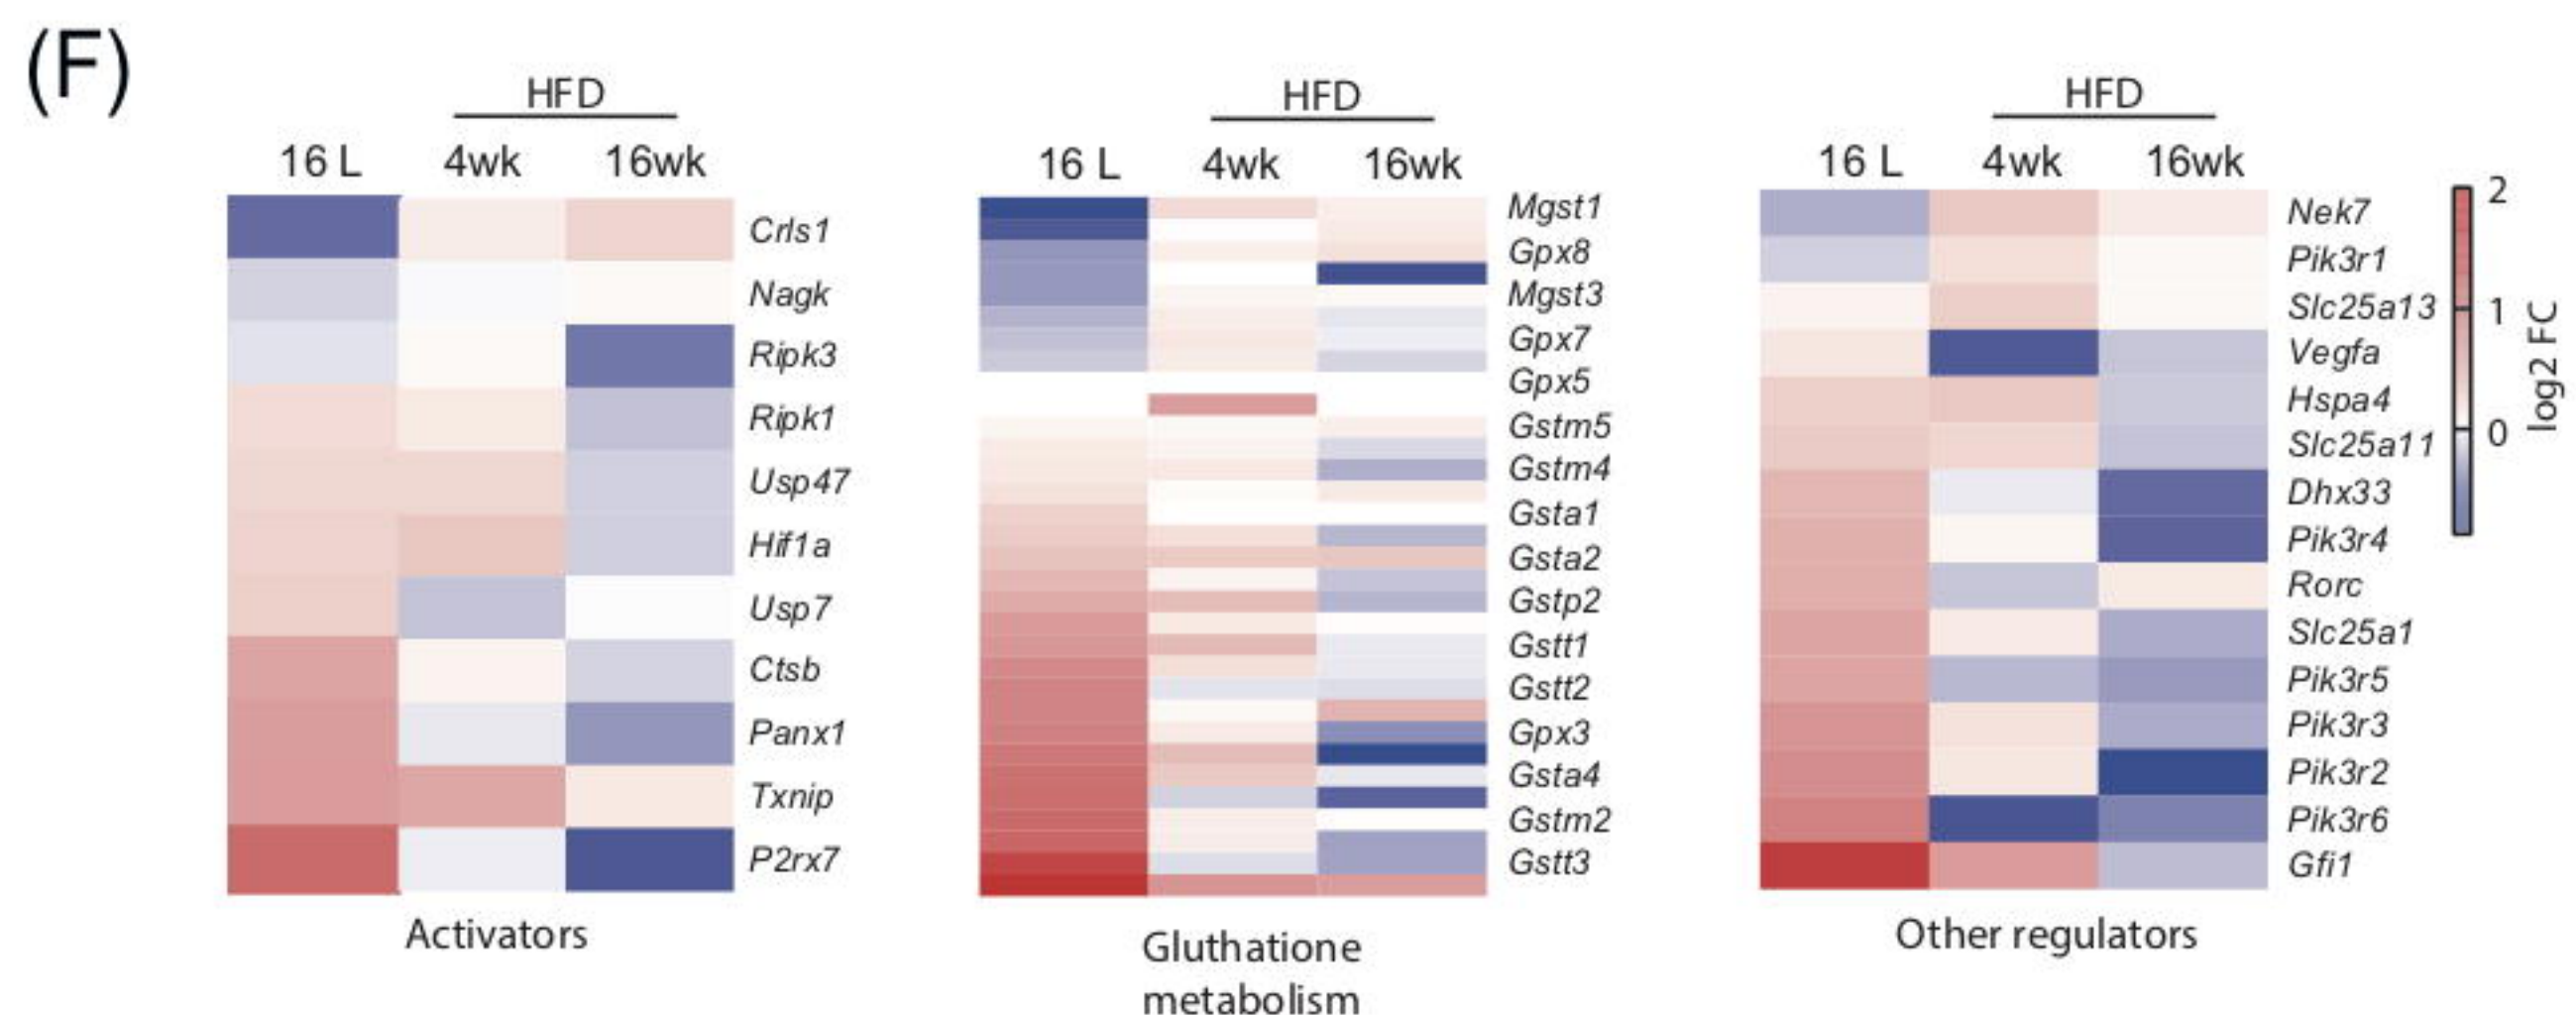



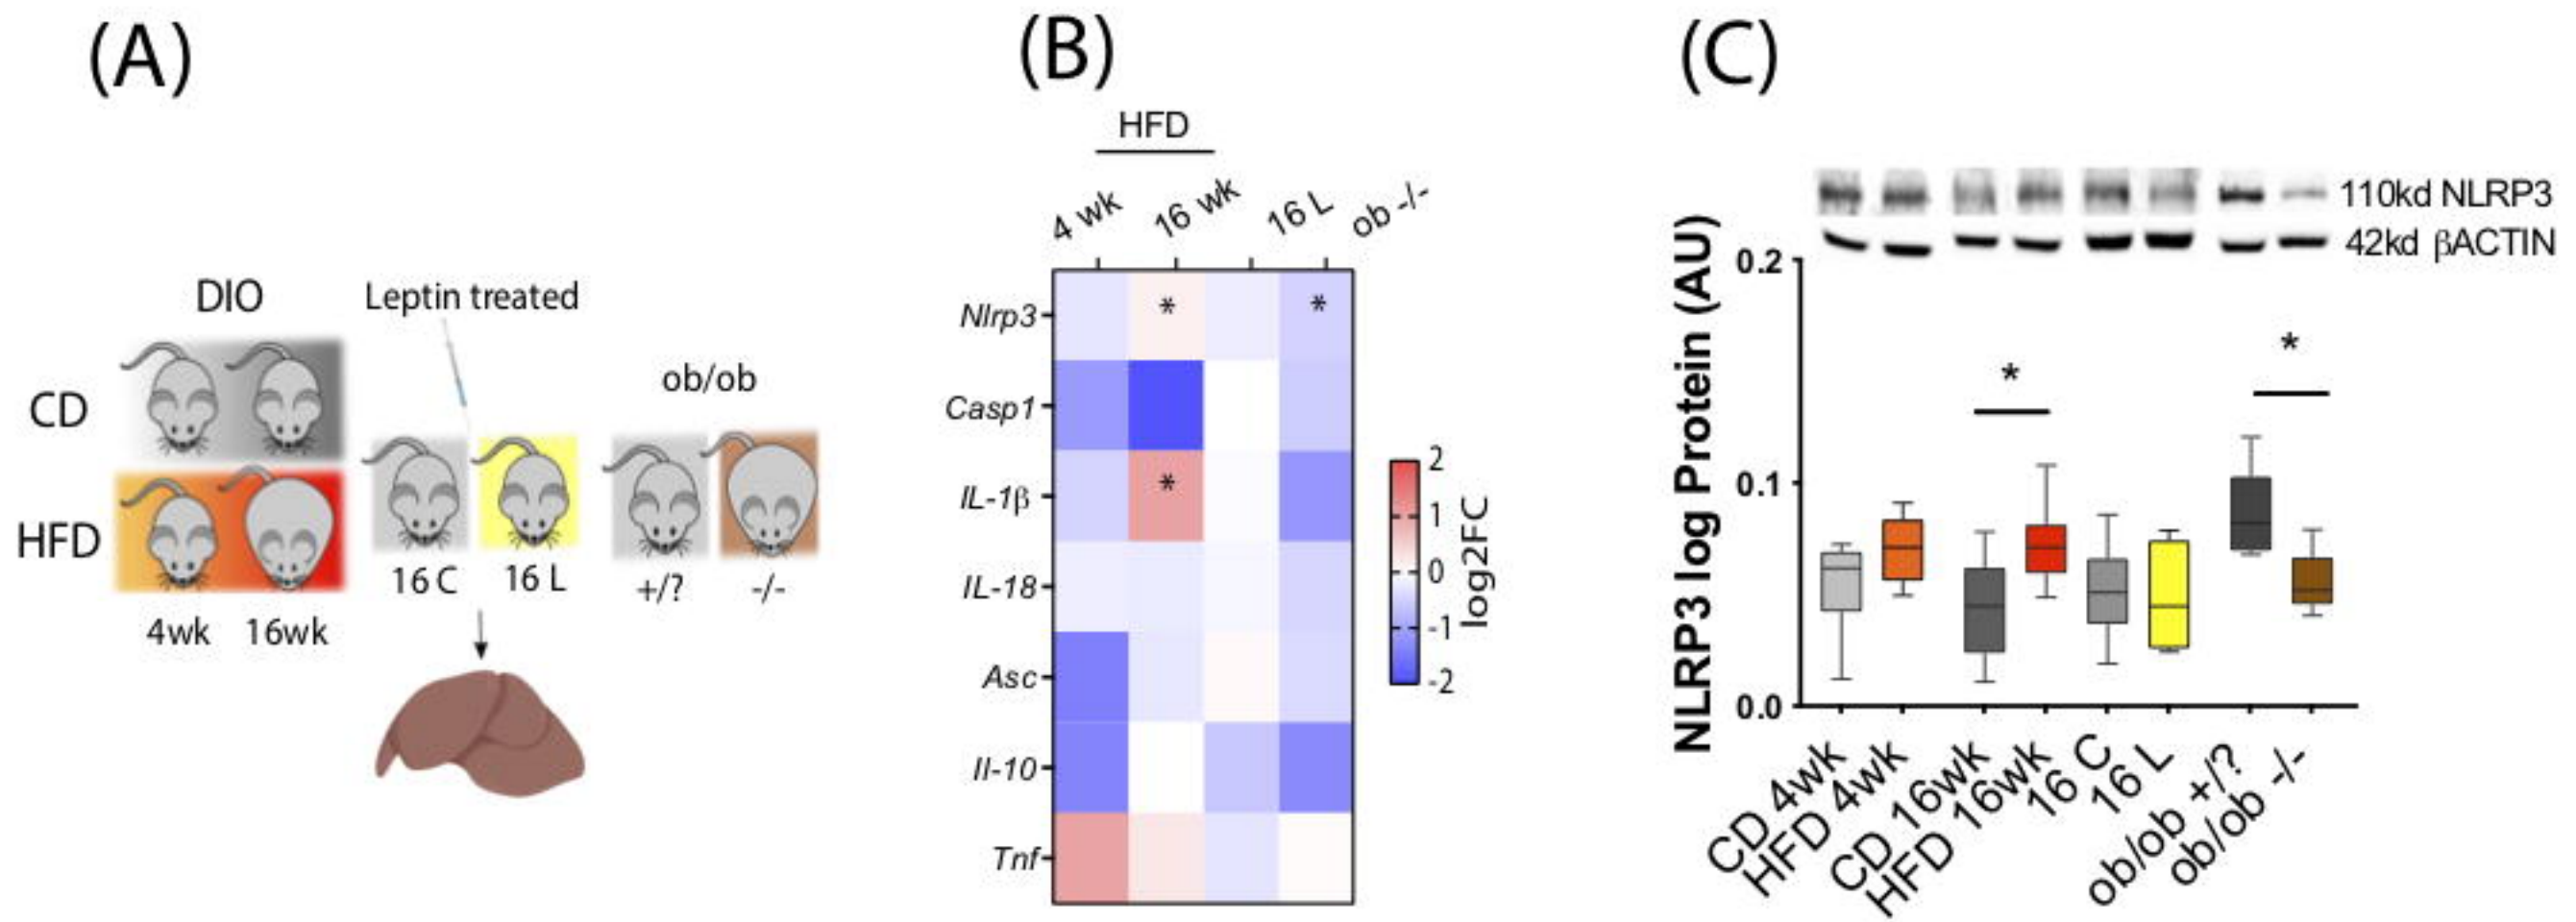

bioRxiv preprint doi: <https://doi.org/10.1101/2021.08.16.456479>; this version posted August 17, 2021. The copyright holder for this preprint (which was not certified by peer review) is the author/funder, who has granted bioRxiv a license to display the preprint in perpetuity. It is made available under aCC-BY-NC-ND 4.0 International license.

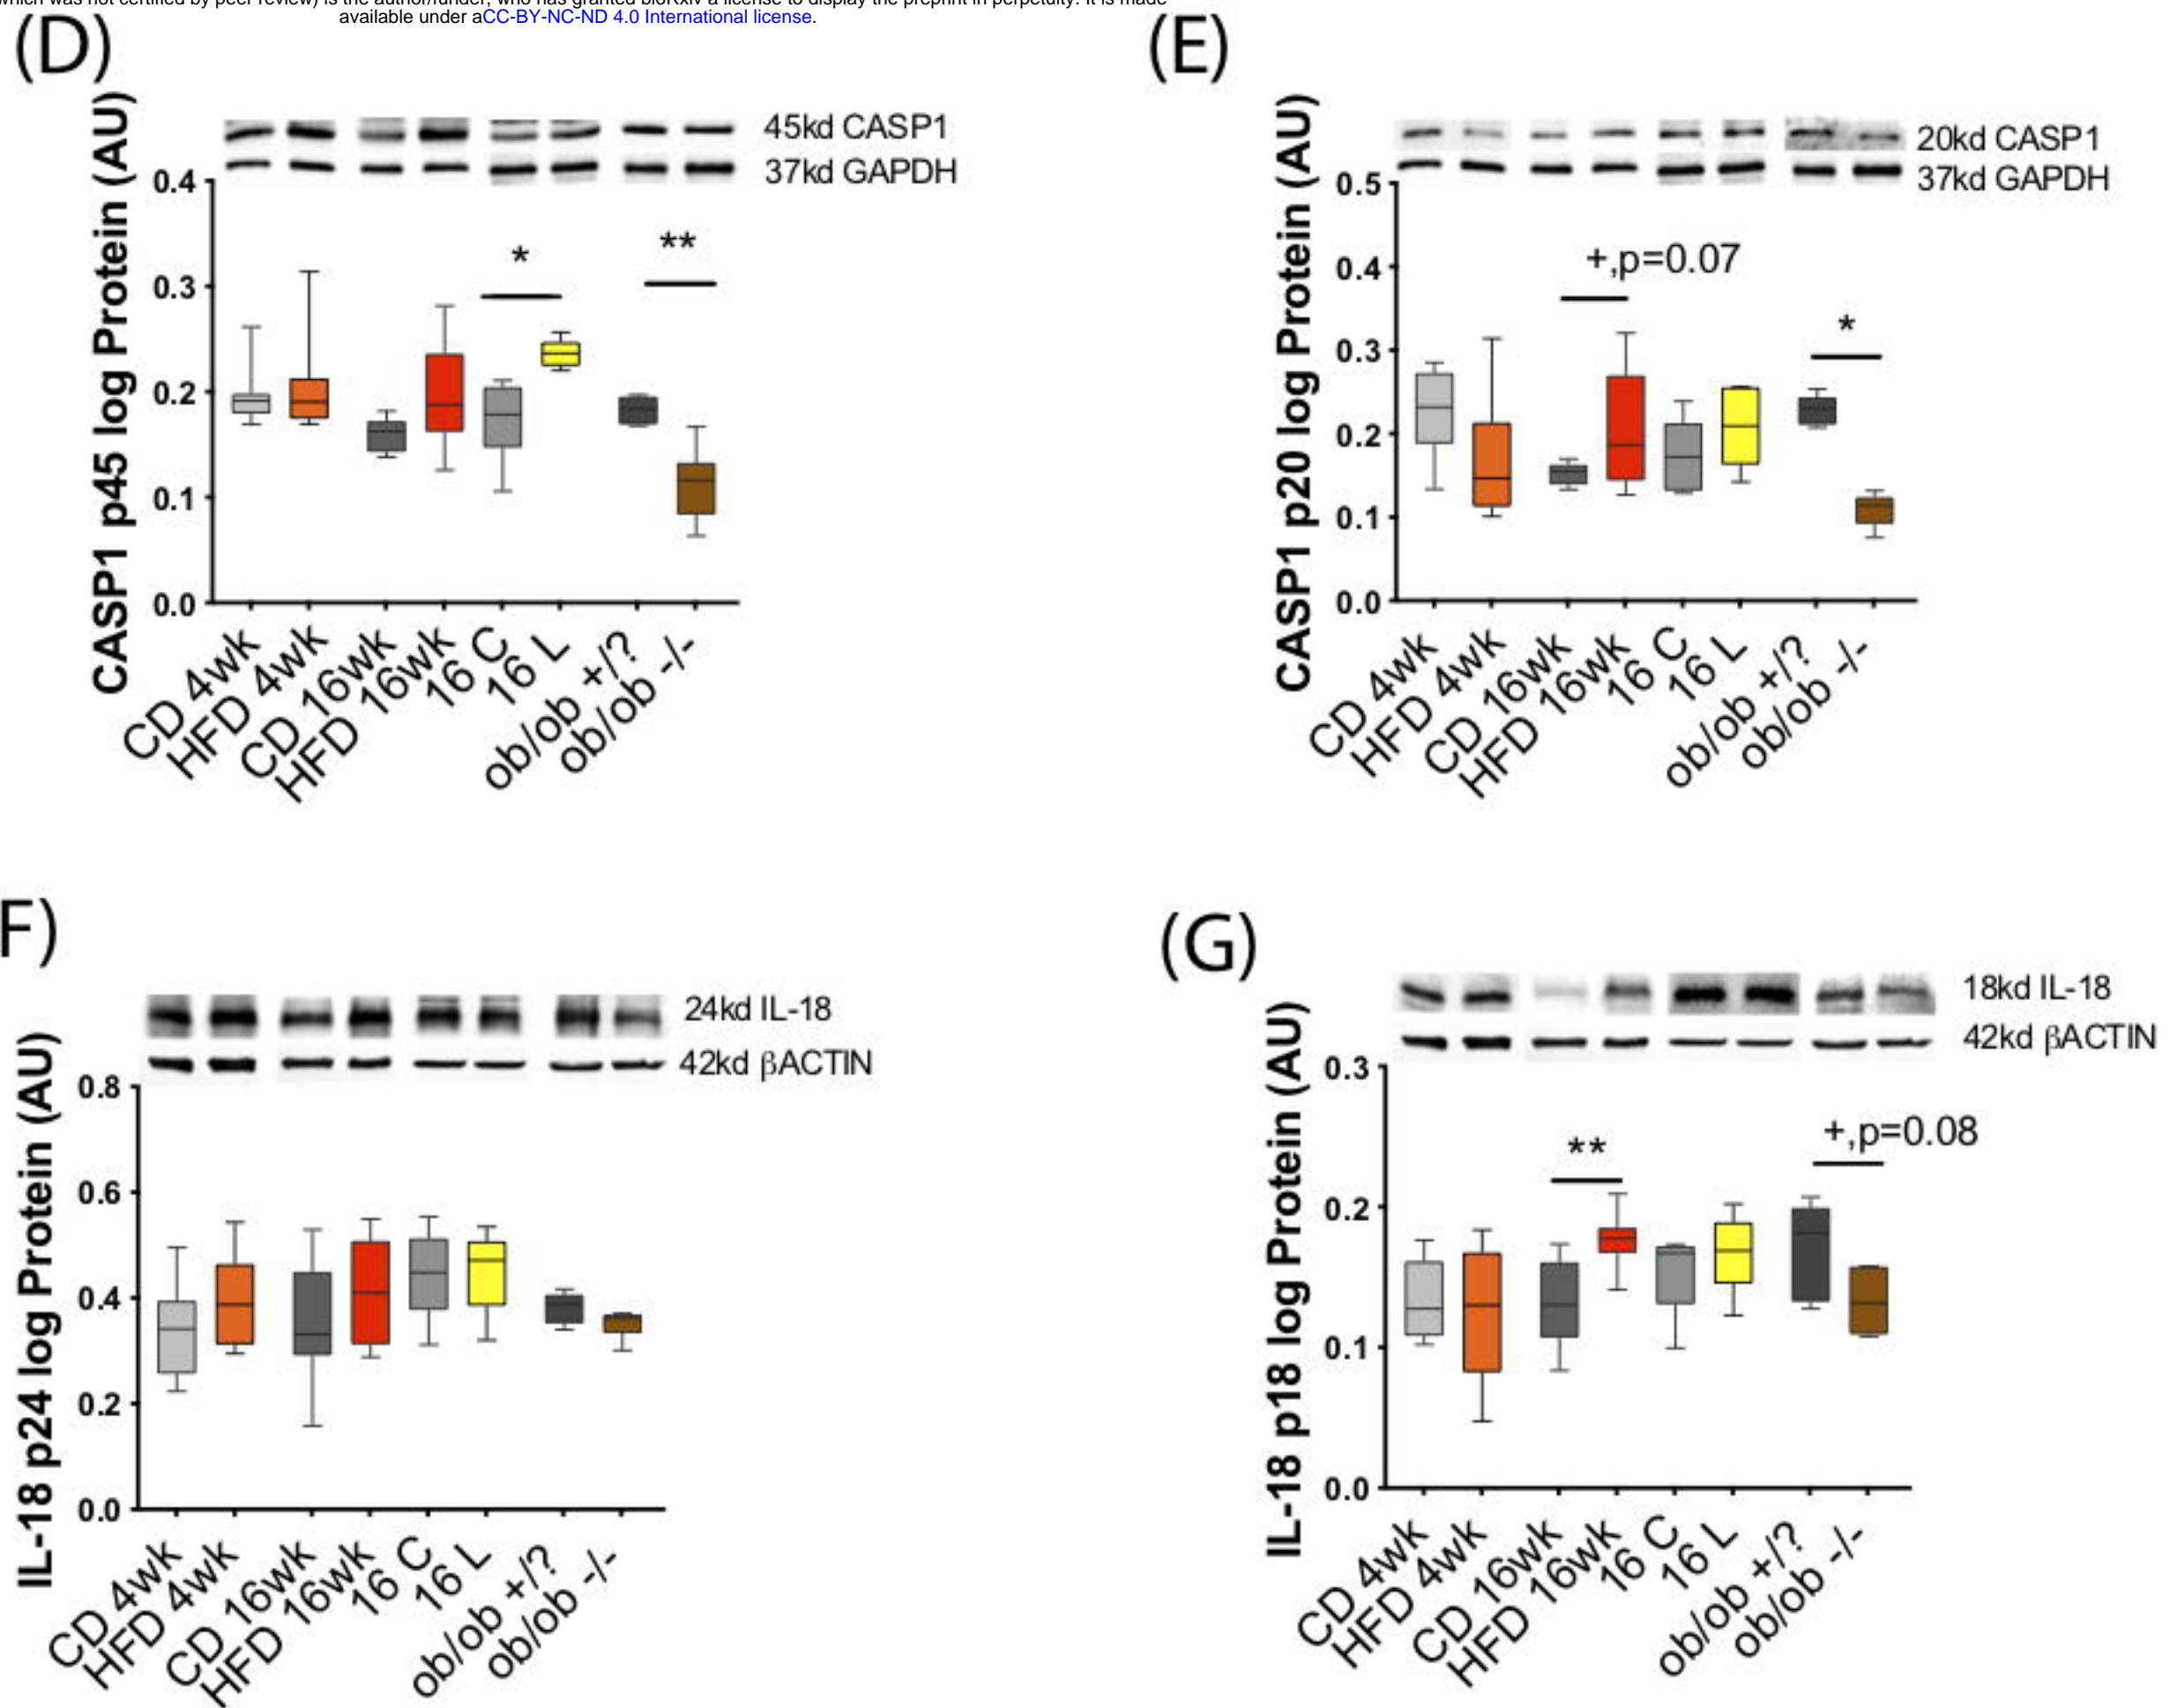

Source: http://biorxiv.org/content/10.1101/2021.08.16.456479v1.full.pdf
